# Supplementary material for: The Novel Regulatory Role of lncRNA-miRNA-mRNA Axis in Amyotrophic Lateral Sclerosis: An Integrated Bioinformatics Analysis
Source: PubMed Central journal article supplement (PMC8067776; doi:10.1155/2021/5526179), 2021-04-15

Figure S1

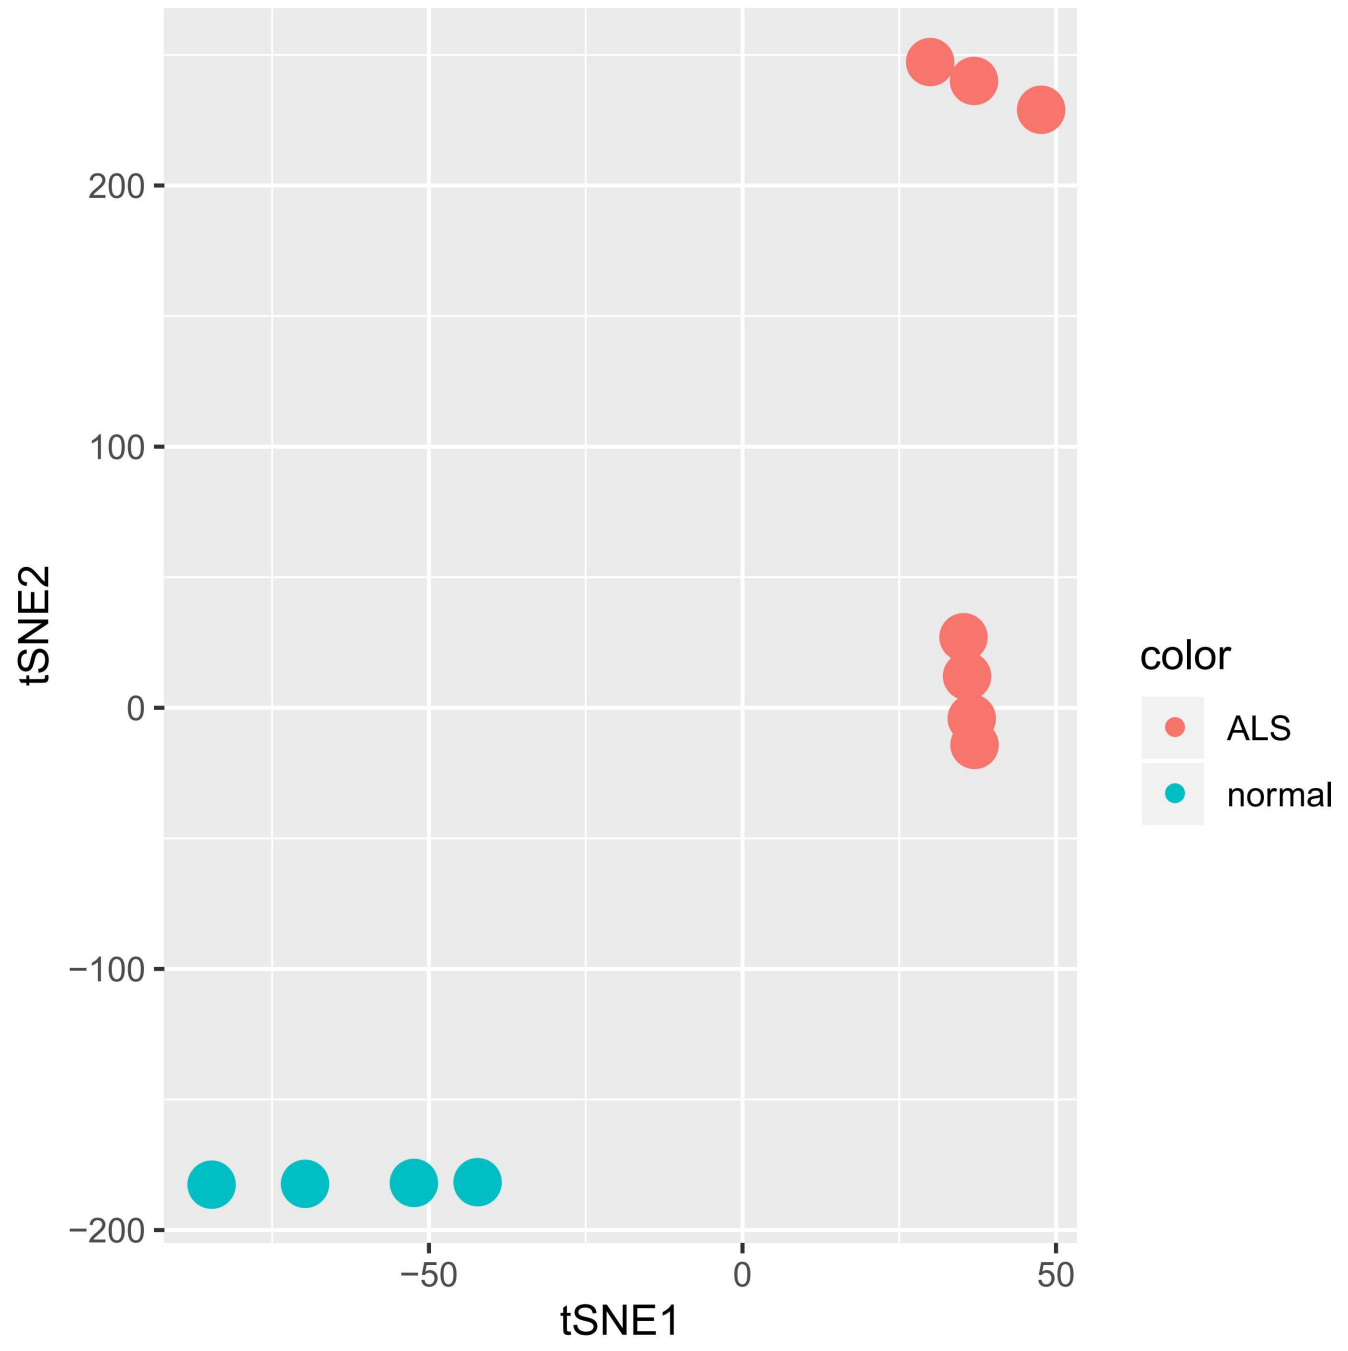

Supplement: 5526179.f1.pdf [file 5526179.f1.pdf]
