# Supplementary material for: The Novel Regulatory Role of lncRNA-miRNA-mRNA Axis in Amyotrophic Lateral Sclerosis: An Integrated Bioinformatics Analysis
Source: PubMed Central journal article supplement (PMC8067776; doi:10.1155/2021/5526179), 2021-04-15
Supplement: 5526179.f3.pdf [file 5526179.f3.pdf]

| lncRNA         | miRNAs                 | mRNA     |
|----------------|------------------------|----------|
| RP11-332H14.2  | hsa-miR-500a-5p;hsa-   | SCYL3    |
| MALAT1         | hsa-miR-101-3p;hsa-r   | GCLC     |
| RP11-458F8.4   | hsa-let-7a-5p;hsa-let- | PLXND1   |
| RP11-78O7.2    | hsa-let-7a-5p;hsa-let- | PLXND1   |
| MALAT1         | hsa-miR-106a-5p;hsa-   | VPS50    |
| LINC00910      | hsa-miR-15a-5p;hsa-r   | LAMP2    |
| CTC-459F4.1    | hsa-miR-148a-3p;hsa-   | MAP3K9   |
| LINC00662      | hsa-miR-101-3p;hsa-r   | COX10    |
| LINC01355      | hsa-miR-30a-5p;hsa-r   | UBE3C    |
| NEAT1          | hsa-miR-136-3p;hsa-r   | UBE3C    |
| MALAT1         | hsa-miR-124-5p;hsa-r   | REV3L    |
| NEAT1          | hsa-miR-124-5p;hsa-r   | REV3L    |
| FTX            | hsa-let-7a-5p;hsa-let- | ZNF200   |
| LINC01355      | hsa-miR-30a-5p;hsa-r   | ZNF200   |
| RP11-488L18.10 | hsa-let-7a-5p;hsa-let- | ZNF200   |
| NEAT1          | hsa-miR-10b-5p;hsa-r   | HIVEP2   |
| MALAT1         | hsa-miR-106b-5p;hsa-   | BTBD7    |
| XIST           | hsa-miR-106b-5p;hsa-   | BTBD7    |
| NEAT1          | hsa-miR-1224-3p;hsa-   | PIK3C2A  |
| LINC00106      | hsa-miR-124-3p;hsa-r   | MAN2B2   |
| LINC01355      | hsa-miR-30a-5p;hsa-r   | PGM3     |
| NEAT1          | hsa-miR-126-5p;hsa-r   | PGM3     |
| LINC01355      | hsa-miR-15a-5p;hsa-r   | CCDC88C  |
| MALAT1         | hsa-miR-100-3p;hsa-r   | ERP44    |
| LINC00467      | hsa-miR-130a-3p;hsa-   | RRAGD    |
| MALAT1         | hsa-miR-142-3p;hsa-r   | BCLAF1   |
| PWAR6          | hsa-miR-17-5p;hsa-mi   | SLC4A7   |
| RP11-332H14.2  | hsa-miR-30b-5p;hsa-r   | SLC4A7   |
| PWAR6          | hsa-miR-135a-5p;hsa-   | PHLPP2   |
| RP11-332H14.2  | hsa-miR-30a-5p;hsa-r   | JADE2    |
| NEAT1          | hsa-let-7a-3p;hsa-let- | ARAP2    |
| FTX            | hsa-let-7a-5p;hsa-let- | C12orf4  |
| XIST           | hsa-let-7g-3p;hsa-miR  | USP28    |
| NEAT1          | hsa-let-7a-3p;hsa-let- | ZNF800   |
| RP11-701H24.4  | hsa-miR-17-5p;hsa-mi   | ZNF800   |
| C1orf132       | hsa-let-7a-5p;hsa-let- | HERPUD1  |
| LINC00667      | hsa-miR-106b-5p;hsa-   | SIKE1    |
| MEG3           | hsa-miR-106a-5p;hsa-   | TRAF3IP2 |
| RP11-631N16.2  | hsa-miR-106b-5p;hsa-   | DCBLD2   |
| XIST           | hsa-miR-15a-5p;hsa-r   | SEC61A1  |
| LINC00662      | hsa-miR-15a-5p;hsa-r   | CDK17    |
| LINC00662      | hsa-miR-378a-3p;hsa-   | SPA17    |
| RP11-352M15.2  | hsa-miR-126-5p;hsa-r   | BTBD1    |
| LINC01355      | hsa-miR-30a-5p;hsa-r   | SEC61A2  |
| LINC00667      | hsa-miR-181a-5p;hsa-   | ASB1     |
| XIST           | hsa-miR-106b-5p;hsa-   | ATG2B    |
| MIRLET7BHG     | hsa-miR-188-3p;hsa-r   | SDK2     |
| MALAT1         | hsa-miR-101-3p;hsa-r   | RORA     |
| LINC00667      | hsa-miR-181a-5p;hsa-   | AP3M2    |
| NORAD          | hsa-miR-224-5p;hsa-r   | CDC42    |
| XIST           | hsa-let-7a-5p;hsa-let- | RAD18    |
| NEAT1          | hsa-miR-106b-5p;hsa-   | ATP2B1   |
| NORAD          | hsa-miR-129-5p;hsa-r   | RDH11    |

|                |                               |
|----------------|-------------------------------|
| MALAT1         | hsa-miR-142-3p;hsa-rr AFF4    |
| MALAT1         | hsa-miR-1-3p;hsa-miR PICALM   |
| RP11-631N16.2  | hsa-miR-106a-5p;hsa- TSG101   |
| PKI55          | hsa-miR-15a-5p;hsa-rr FRYL    |
| LINC01355      | hsa-miR-15a-5p;hsa-rr FRYL    |
| C17orf100      | hsa-let-7a-5p;hsa-let- MAP2K7 |
| LINC00910      | hsa-let-7a-5p;hsa-let- RABL2B |
| C1orf132       | hsa-miR-106a-5p;hsa- SESN1    |
| LINC00667      | hsa-miR-106b-5p;hsa- SESN1    |
| MALAT1         | hsa-miR-106a-5p;hsa- CNOT4    |
| LINC00667      | hsa-miR-148b-3p;hsa- HSP90AA1 |
| LINC00910      | hsa-miR-15a-5p;hsa-rr GSK3B   |
| RNU12          | hsa-miR-548a-5p;hsa- LYRM2    |
| PWAR6          | hsa-miR-126-5p;hsa-rr CYLD    |
| PWAR6          | hsa-miR-15a-5p;hsa-rr YTHDC1  |
| RP11-78O7.2    | hsa-let-7a-5p;hsa-let- NOA1   |
| NEAT1          | hsa-miR-106a-5p;hsa- RRN3     |
| CTD-2587M2.1   | hsa-miR-25-3p;hsa-mi RRN3     |
| XIST           | hsa-miR-124-3p;hsa-rr B4GALT1 |
| C1orf132       | hsa-let-7a-5p;hsa-let- TXLNG  |
| RP11-332H14.2  | hsa-miR-30a-5p;hsa-rr ALG9    |
| RP11-498C9.15  | hsa-miR-27a-3p;hsa-rr ALG9    |
| PKI55          | hsa-miR-101-3p;hsa-rr L2HGDH  |
| NEAT1          | hsa-miR-1-3p;hsa-miR KLHL42   |
| NORAD          | hsa-miR-106b-5p;hsa- GNAS     |
| SNHG8          | hsa-miR-19a-3p;hsa-rr SNX5    |
| PWAR6          | hsa-miR-15a-5p;hsa-rr GANAB   |
| C1orf132       | hsa-miR-136-5p;hsa-rr GANAB   |
| PWAR6          | hsa-miR-124-3p;hsa-rr USP48   |
| NEAT1          | hsa-miR-125a-3p;hsa- RBM27    |
| C1orf132       | hsa-let-7a-5p;hsa-let- CDV3   |
| C1orf132       | hsa-miR-129-5p;hsa-rr ESR1    |
| RP11-332H14.2  | hsa-miR-30a-5p;hsa-rr SEMA6A  |
| RNU12          | hsa-miR-15a-5p;hsa-rr CLSPN   |
| RP11-488L18.10 | hsa-let-7a-5p;hsa-let- CBX5   |
| RP11-138A9.1   | hsa-miR-200c-3p;hsa- SIRT1    |
| NEAT1          | hsa-miR-142-3p;hsa-rr DDX17   |
| LINC00106      | hsa-miR-185-3p;hsa-rr SBF1    |
| PWAR6          | hsa-miR-19a-3p;hsa-rr CBX7    |
| C1orf132       | hsa-let-7a-5p;hsa-let- PDGFB  |
| XIST           | hsa-miR-148a-3p;hsa- SOS2     |
| XIST           | hsa-miR-106a-5p;hsa- NIN      |
| MALAT1         | hsa-miR-106a-5p;hsa- NIN      |
| LINC00969      | hsa-miR-145-5p;hsa-rr HIF1A   |
| RP11-332H14.2  | hsa-miR-30a-5p;hsa-rr ZMYND8  |
| PWAR6          | hsa-miR-143-3p;hsa-rr JAG1    |
| NORAD          | hsa-let-7a-5p;hsa-miR E2F1    |
| LINC00910      | hsa-miR-15a-5p;hsa-rr RPRD1B  |
| GS1-124K5.11   | hsa-miR-15a-5p;hsa-rr RPRD1B  |
| PWAR6          | hsa-miR-15a-5p;hsa-rr RNMT    |
| PWAR6          | hsa-miR-15a-5p;hsa-rr MIB1    |
| RP11-332H14.2  | hsa-miR-30a-5p;hsa-rr MIB1    |
| RNU12          | hsa-miR-130a-5p;hsa- STS      |
| NORAD          | hsa-let-7a-5p;hsa-let- PGRMC1 |

|                |                                |
|----------------|--------------------------------|
| LINC00467      | hsa-miR-130a-3p;hsa- NKAP      |
| MALAT1         | hsa-miR-103a-2-5p;hs XIAP      |
| MALAT1         | hsa-miR-101-3p;hsa-rr EEA1     |
| MIRLET7BHG     | hsa-miR-34a-5p;hsa-rr CD40LG   |
| NORAD          | hsa-miR-1825;hsa-miR TSC22D1   |
| MALAT1         | hsa-miR-30a-3p;hsa-rr ARL2BP   |
| RP11-488L18.10 | hsa-let-7a-5p;hsa-let- SLC38A7 |
| NEAT1          | hsa-miR-145-5p;hsa-rr ABCC1    |
| C17orf100      | hsa-let-7a-5p;hsa-let- GABPB1  |
| MALAT1         | hsa-miR-103a-3p;hsa- DECR1     |
| MALAT1         | hsa-miR-148a-3p;hsa- IKBKB     |
| MALAT1         | hsa-miR-106b-5p;hsa- UBR5      |
| NEAT1          | hsa-miR-106b-5p;hsa- UBR5      |
| MALAT1         | hsa-miR-106a-5p;hsa- MTMR9     |
| NEAT1          | hsa-miR-106a-5p;hsa- MTMR9     |
| NORAD          | hsa-miR-106a-5p;hsa- TGFB1     |
| LINC00467      | hsa-miR-130a-3p;hsa- KDELRL1   |
| LINC01355      | hsa-miR-15a-5p;hsa-rr AVL9     |
| C1orf132       | hsa-miR-125a-3p;hsa- LFNG      |
| RP11-67L2.2    | hsa-let-7d-5p;hsa-miR WASL     |
| PKI55          | hsa-let-7a-5p;hsa-let- AP1S1   |
| C17orf100      | hsa-let-7a-5p;hsa-let- AP1S1   |
| FTX            | hsa-let-7a-5p;hsa-let- AP1S1   |
| LINC00969      | hsa-miR-129-5p;hsa-rr GLCCI1   |
| MALAT1         | hsa-miR-129-5p;hsa-rr TMEM245  |
| RP11-498C9.15  | hsa-miR-125a-3p;hsa- TBC1D13   |
| PKI55          | hsa-miR-1-3p;hsa-miR RAB11FIP2 |
| RP11-631N16.2  | hsa-miR-30a-5p;hsa-rr PPP3CB   |
| LINC00667      | hsa-miR-103a-3p;hsa- CPEB3     |
| RP11-67L2.2    | hsa-miR-25-3p;hsa-mi CPEB3     |
| PWAR6          | hsa-miR-15a-5p;hsa-rr CUL2     |
| C1orf132       | hsa-miR-15a-5p;hsa-rr CUL2     |
| RP11-488L18.10 | hsa-let-7a-5p;hsa-let- FBXL20  |
| LINC01355      | hsa-miR-15a-5p;hsa-rr MTMR4    |
| MALAT1         | hsa-miR-10a-3p;hsa-rr AKAP10   |
| PWAR6          | hsa-miR-15a-5p;hsa-rr PEX12    |
| MALAT1         | hsa-miR-106b-5p;hsa- EZH1      |
| NORAD          | hsa-miR-106a-5p;hsa- PRKAR1A   |
| MALAT1         | hsa-miR-138-5p;hsa-rr NFKB1    |
| NEAT1          | hsa-miR-138-5p;hsa-rr NFKB1    |
| PWAR6          | hsa-miR-15a-5p;hsa-rr PPP6R3   |
| NORAD          | hsa-let-7a-5p;hsa-let- EIF4G2  |
| LINC00969      | hsa-miR-129-5p;hsa-rr EXPH5    |
| XIST           | hsa-miR-1260a;hsa-mi PRDM4     |
| DUBR           | hsa-miR-1-3p;hsa-miR CORO1C    |
| MALAT1         | hsa-miR-106a-5p;hsa- CAPRIN2   |
| NEAT1          | hsa-miR-106a-5p;hsa- CAPRIN2   |
| XIST           | hsa-miR-106b-5p;hsa- PTGES3    |
| C1orf132       | hsa-miR-15a-5p;hsa-rr CREBL2   |
| LINC00667      | hsa-miR-148b-3p;hsa- CDKN1B    |
| RP11-67L2.2    | hsa-miR-196b-5p;hsa- CDKN1B    |
| AC004951.6     | hsa-miR-30a-3p;hsa-rr CDKN1B   |
| GS1-124K5.11   | hsa-miR-15a-5p;hsa-rr NAA25    |
| NEAT1          | hsa-miR-1277-5p;hsa- BTN3A3    |

|                |                                |
|----------------|--------------------------------|
| LINC01355      | hsa-miR-15a-5p;hsa-rr BTN3A3   |
| RP11-352M15.2  | hsa-miR-21-5p;hsa-mi E2F3      |
| NORAD          | hsa-let-7g-3p;hsa-miR PTP4A1   |
| LINC00667      | hsa-miR-181a-5p;hsa- TMEM30A   |
| RP11-121C2.2   | hsa-miR-106a-5p;hsa- ENPP5     |
| PVT1           | hsa-miR-148a-3p;hsa- MRPS27    |
| LINC00910      | hsa-miR-15a-5p;hsa-rr SEC24A   |
| GS1-124K5.11   | hsa-miR-15a-5p;hsa-rr SEC24A   |
| NEAT1          | hsa-miR-1267;hsa-miR CPEB4     |
| MALAT1         | hsa-miR-1267;hsa-miR CPEB4     |
| RP11-488L18.10 | hsa-miR-181a-5p;hsa- CPEB4     |
| NORAD          | hsa-miR-106a-5p;hsa- MORC1     |
| NEAT1          | hsa-miR-122-5p;hsa-rr FOXF1    |
| XIST           | hsa-miR-124-3p;hsa-rr INO80D   |
| LINC00667      | hsa-miR-181a-5p;hsa- INO80D    |
| PKI55          | hsa-let-7a-5p;hsa-let- SNX17   |
| MALAT1         | hsa-miR-193a-3p;hsa- ASB3      |
| C1orf132       | hsa-miR-15a-5p;hsa-rr LANCL1   |
| PWAR6          | hsa-miR-15a-5p;hsa-rr LANCL1   |
| RP11-631N16.2  | hsa-miR-30a-5p;hsa-rr KDM3A    |
| RP11-332H14.2  | hsa-miR-30b-5p;hsa-rr STRN     |
| MALAT1         | hsa-miR-100-3p;hsa-rr SLC25A12 |
| NEAT1          | hsa-miR-100-3p;hsa-rr SLC25A12 |
| MALAT1         | hsa-miR-106b-5p;hsa- AAK1      |
| RP11-78O7.2    | hsa-let-7a-5p;hsa-let- PLEKHA3 |
| NEAT1          | hsa-let-7a-5p;hsa-let- EPHA4   |
| MIRLET7BHG     | hsa-miR-140-3p;hsa-rr RPL22    |
| RP11-67L2.2    | hsa-let-7d-5p;hsa-miR MEF2D    |
| PWAR6          | hsa-miR-145-5p;hsa-rr IVNS1ABP |
| NEAT1          | hsa-miR-107;hsa-miR- RIMS3     |
| XIST           | hsa-miR-106b-5p;hsa- GBP3      |
| C1orf132       | hsa-miR-1224-3p;hsa- RCAN3     |
| C1orf132       | hsa-miR-125b-5p;hsa- RPS6KA1   |
| XIST           | hsa-miR-132-3p;hsa-rr STAG1    |
| MALAT1         | hsa-miR-132-3p;hsa-rr STAG1    |
| LINC00106      | hsa-miR-1914-3p;hsa- CREB1     |
| RP11-631N16.2  | hsa-miR-106b-5p;hsa- ANKRD13C  |
| RP11-631N16.2  | hsa-miR-106a-5p;hsa- DNAL1     |
| XIST           | hsa-miR-103a-3p;hsa- TTLL5     |
| LINC00667      | hsa-miR-181a-5p;hsa- RBM25     |
| RP11-67L2.2    | hsa-miR-137;hsa-miR- SUPT7L    |
| MEG3           | hsa-miR-106b-5p;hsa- GPAM      |
| RNU12          | hsa-miR-17-5p;hsa-mi MXI1      |
| RP11-701H24.4  | hsa-miR-3065-5p;hsa- HOXB3     |
| NEAT1          | hsa-miR-103a-2-5p;hs CD274     |
| NEAT1          | hsa-miR-1271-5p;hsa- NUP43     |
| MIRLET7BHG     | hsa-miR-24-3p;hsa-mi WDR55     |
| MALAT1         | hsa-let-7a-5p;hsa-let- COIL    |
| RP11-488L18.10 | hsa-let-7a-5p;hsa-let- COIL    |
| C1orf132       | hsa-miR-146a-3p;hsa- CXCR4     |
| RP11-488L18.10 | hsa-let-7b-5p;hsa-let- ZNF644  |
| NEAT1          | hsa-let-7b-5p;hsa-let- ZNF644  |
| MALAT1         | hsa-miR-107;hsa-miR- HNRNPA2B1 |
| NORAD          | hsa-miR-101-3p;hsa-rr NT5C3A   |

|                |                                     |         |
|----------------|-------------------------------------|---------|
| C17orf100      | hsa-let-7a-5p;hsa-let-7a-5p         | ACOT9   |
| MALAT1         | hsa-miR-1260a;hsa-miR-1260a         | ORMDL2  |
| PWAR6          | hsa-miR-101-3p;hsa-miR-101-3p       | RAP2C   |
| MAPKAPK5-AS1   | hsa-miR-101-3p;hsa-miR-101-3p       | RAP2C   |
| MALAT1         | hsa-miR-103a-2-5p;hsa-miR-103a-2-5p | PLCG1   |
| RP11-332H14.2  | hsa-miR-30b-5p;hsa-miR-30b-5p       | STX16   |
| PWAR6          | hsa-miR-101-3p;hsa-miR-101-3p       | STX16   |
| MAPKAPK5-AS1   | hsa-miR-101-3p;hsa-miR-101-3p       | STX16   |
| C1orf132       | hsa-miR-146a-3p;hsa-miR-146a-3p     | ZNF391  |
| MIRLET7BHG     | hsa-miR-29a-3p;hsa-miR-29a-3p       | KLHDC3  |
| XIST           | hsa-let-7a-5p;hsa-let-7a-5p         | GLO1    |
| LINC00662      | hsa-miR-15a-5p;hsa-miR-15a-5p       | SLC35B3 |
| NEAT1          | hsa-miR-103a-3p;hsa-miR-103a-3p     | RUNX2   |
| PWAR6          | hsa-miR-15a-5p;hsa-miR-15a-5p       | TM9SF2  |
| RP11-78O7.2    | hsa-let-7a-5p;hsa-let-7a-5p         | OPA3    |
| C1orf132       | hsa-miR-15a-5p;hsa-miR-15a-5p       | TBC1D20 |
| PWAR6          | hsa-miR-15a-5p;hsa-miR-15a-5p       | TBC1D20 |
| RP11-458F8.4   | hsa-let-7a-5p;hsa-let-7a-5p         | PLAGL2  |
| LINC00667      | hsa-miR-30a-3p;hsa-miR-30a-3p       | BECN1   |
| XIST           | hsa-miR-129-5p;hsa-miR-129-5p       | ZNF384  |
| LINC00667      | hsa-miR-106b-5p;hsa-miR-106b-5p     | ATG14   |
| XIST           | hsa-miR-106b-5p;hsa-miR-106b-5p     | ATG14   |
| LINC01355      | hsa-miR-15a-5p;hsa-miR-15a-5p       | IPPK    |
| RP11-67L2.2    | hsa-miR-25-3p;hsa-miR-25-3p         | BCL11B  |
| MIRLET7BHG     | hsa-miR-24-3p;hsa-miR-24-3p         | RBM48   |
| MIR222HG       | hsa-miR-34a-5p;hsa-miR-34a-5p       | MKLN1   |
| MALAT1         | hsa-miR-106b-5p;hsa-miR-106b-5p     | VPS13C  |
| NEAT1          | hsa-miR-106b-5p;hsa-miR-106b-5p     | VPS13C  |
| C1orf132       | hsa-miR-1226-3p;hsa-miR-1226-3p     | MBD4    |
| RP11-67L2.2    | hsa-miR-137;hsa-miR-137             | SPCS3   |
| NORAD          | hsa-miR-106a-5p;hsa-miR-106a-5p     | EGLN3   |
| RP11-78O7.2    | hsa-let-7a-5p;hsa-let-7a-5p         | THEM6   |
| RP11-458F8.4   | hsa-let-7a-5p;hsa-let-7a-5p         | THEM6   |
| C1orf132       | hsa-miR-145-5p;hsa-miR-145-5p       | SESN2   |
| MIR222HG       | hsa-miR-1224-5p;hsa-miR-1224-5p     | ZNF317  |
| NEAT1          | hsa-miR-106a-5p;hsa-miR-106a-5p     | ZNF426  |
| XIST           | hsa-miR-106a-5p;hsa-miR-106a-5p     | RLIM    |
| LINC00667      | hsa-miR-106b-5p;hsa-miR-106b-5p     | RLIM    |
| XIST           | hsa-miR-1293;hsa-miR-1293           | DIAPH1  |
| FTX            | hsa-miR-125a-5p;hsa-miR-125a-5p     | RAF1    |
| XIST           | hsa-miR-106a-5p;hsa-miR-106a-5p     | RAN     |
| LINC00910      | hsa-miR-15a-5p;hsa-miR-15a-5p       | PRKAA1  |
| RP11-498C9.15  | hsa-miR-548am-5p;hsa-miR-548am-5p   | ANKEF1  |
| MALAT1         | hsa-miR-1305;hsa-miR-1305           | AP3B1   |
| RP11-488L18.10 | hsa-miR-26a-5p;hsa-miR-26a-5p       | DCTN4   |
| PWAR6          | hsa-miR-17-5p;hsa-miR-17-5p         | RFXAP   |
| NORAD          | hsa-miR-106b-5p;hsa-miR-106b-5p     | MKRN1   |
| MALAT1         | hsa-miR-25-3p;hsa-miR-25-3p         | ZFC3H1  |
| XIST           | hsa-let-7a-5p;hsa-let-7a-5p         | MBD2    |
| LINC00969      | hsa-miR-15a-5p;hsa-miR-15a-5p       | CD180   |
| GS1-124K5.11   | hsa-miR-103a-3p;hsa-miR-103a-3p     | CD180   |
| C17orf100      | hsa-let-7a-5p;hsa-let-7a-5p         | ARL8B   |
| MALAT1         | hsa-miR-1271-5p;hsa-miR-1271-5p     | NOTCH2  |
| XIST           | hsa-miR-16-5p;hsa-miR-16-5p         | NAPG    |

|               |                                |
|---------------|--------------------------------|
| XIST          | hsa-miR-1269b;hsa-mi SLC38A2   |
| MALAT1        | hsa-miR-107;hsa-miR- CLOCK     |
| XIST          | hsa-miR-107;hsa-miR- CLOCK     |
| LINC00910     | hsa-miR-15a-5p;hsa-rr ARHGAP32 |
| XIST          | hsa-miR-139-5p;hsa-rr TMED7    |
| LINC00662     | hsa-miR-107;hsa-miR- MAP3K7    |
| PKI55         | hsa-miR-15a-5p;hsa-rr MAP3K7   |
| RNU12         | hsa-miR-195-5p;hsa-rr CDK4     |
| MIRLET7BHG    | hsa-miR-21-3p;hsa-mi CPM       |
| NEAT1         | hsa-miR-101-3p;hsa-rr DYNC1LI2 |
| LINC00667     | hsa-miR-103a-3p;hsa- STX6      |
| XIST          | hsa-miR-103a-3p;hsa- STX6      |
| LINC01355     | hsa-miR-30a-5p;hsa-rr USP37    |
| PWAR6         | hsa-miR-15a-5p;hsa-rr SRSF1    |
| MALAT1        | hsa-miR-25-3p;hsa-mi TANK      |
| RP11-7807.2   | hsa-let-7a-5p;hsa-let- TRMO    |
| C1orf132      | hsa-let-7a-5p;hsa-let- MYC     |
| RP11-631N16.2 | hsa-miR-519a-3p;hsa- HADHB     |
| MALAT1        | hsa-miR-1270;hsa-miR LRPPRC    |
| LINC01355     | hsa-miR-30a-5p;hsa-rr ENTPD1   |
| PWAR6         | hsa-miR-15a-5p;hsa-rr ASCC1    |
| MALAT1        | hsa-miR-103a-3p;hsa- PPIG      |
| LINC00667     | hsa-miR-1275;hsa-miR SECISBP2L |
| MALAT1        | hsa-miR-127-3p;hsa-rr SEC31A   |
| RP11-631N16.2 | hsa-miR-1277-5p;hsa- G3BP2     |
| LINC00667     | hsa-miR-181a-5p;hsa- SLC7A1    |
| LINC01355     | hsa-miR-30a-5p;hsa-rr LMBR1L   |
| MIR222HG      | hsa-miR-146a-5p;hsa- ESD       |
| MALAT1        | hsa-miR-106a-5p;hsa- RB1       |
| XIST          | hsa-miR-106b-5p;hsa- WDR89     |
| MALAT1        | hsa-miR-106b-5p;hsa- WDR89     |
| NORAD         | hsa-miR-106a-5p;hsa- BNIP2     |
| MALAT1        | hsa-miR-1271-5p;hsa- GID4      |
| XIST          | hsa-miR-197-3p;hsa-rr TAF4B    |
| LINC00662     | hsa-miR-15a-5p;hsa-rr GNAL     |
| PKI55         | hsa-miR-15a-5p;hsa-rr GNAL     |
| XIST          | hsa-miR-101-3p;hsa-rr SLC39A6  |
| PKI55         | hsa-miR-15a-5p;hsa-rr RAB40B   |
| PWAR6         | hsa-miR-125a-5p;hsa- SMAD4     |
| LINC00969     | hsa-miR-3613-3p;hsa- BRD4      |
| NORAD         | hsa-let-7a-5p;hsa-let- APP     |
| PWAR6         | hsa-miR-124-3p;hsa-rr ALDH9A1  |
| PWAR6         | hsa-miR-15a-5p;hsa-rr GOLPH3L  |
| MALAT1        | hsa-miR-106a-5p;hsa- CEP170    |
| LINC00667     | hsa-miR-19a-3p;hsa-rr SDE2     |
| RP11-67L2.2   | hsa-miR-25-3p;hsa-mi C1orf35   |
| NEAT1         | hsa-miR-103a-3p;hsa- EML4      |
| MALAT1        | hsa-miR-103a-3p;hsa- EML4      |
| RP11-7807.2   | hsa-let-7a-5p;hsa-let- RABL2A  |
| RP11-332H14.2 | hsa-miR-30a-5p;hsa-rr UBXN4    |
| LINC00910     | hsa-let-7a-5p;hsa-let- POLR2D  |
| MALAT1        | hsa-let-7a-5p;hsa-let- GOLGA4  |
| RP11-7807.2   | hsa-let-7a-5p;hsa-let- GOLGA4  |
| NORAD         | hsa-miR-100-5p;hsa-rr CTDSPL   |

|                |                                 |
|----------------|---------------------------------|
| XIST           | hsa-miR-181a-5p;hsa- TMF1       |
| LINC00667      | hsa-miR-181a-5p;hsa- TMF1       |
| LINC01355      | hsa-miR-15a-5p;hsa-r SRPRB      |
| C1orf132       | hsa-miR-1247-5p;hsa- EIF2B5     |
| RP11-488L18.10 | hsa-let-7a-5p;hsa-let- CDKAL1   |
| RP11-67L2.2    | hsa-let-7d-5p;hsa-miR RNF44     |
| RP11-631N16.2  | hsa-miR-106a-5p;hsa- PURB       |
| NEAT1          | hsa-miR-106b-5p;hsa- C7orf43    |
| LINC01355      | hsa-miR-30a-5p;hsa-r C7orf43    |
| RP11-78O7.2    | hsa-let-7a-5p;hsa-let- NOM1     |
| NORAD          | hsa-miR-106a-5p;hsa- NFIB       |
| PWAR6          | hsa-miR-17-5p;hsa-mi FBXO10     |
| LINC00667      | hsa-miR-143-3p;hsa-r SLC25A25   |
| MEG3           | hsa-miR-149-3p;hsa-r MIGA2      |
| MAPKAPK5-AS1   | hsa-miR-200b-3p;hsa- ZEB1       |
| RP11-67L2.2    | hsa-miR-25-3p;hsa-mi EIF4EBP2   |
| LINC00910      | hsa-miR-103a-3p;hsa- LIN7C      |
| RP11-488L18.10 | hsa-let-7a-5p;hsa-let- CELF1    |
| NEAT1          | hsa-let-7f-2-3p;hsa-m SESN3     |
| RP11-488L18.10 | hsa-miR-181a-5p;hsa- ATM        |
| MALAT1         | hsa-miR-101-3p;hsa-r ATM        |
| NORAD          | hsa-miR-106a-5p;hsa- LAMTOR1    |
| C1orf132       | hsa-miR-103a-3p;hsa- EI24       |
| PWAR6          | hsa-miR-126-5p;hsa-r ARID5B     |
| RP11-67L2.2    | hsa-miR-25-3p;hsa-mi TIRAP      |
| RP11-488L18.10 | hsa-let-7a-5p;hsa-let- KIAA1328 |
| XIST           | hsa-miR-129-2-3p;hsa PDCD4      |
| XIST           | hsa-miR-1271-5p;hsa- FOXO1      |
| MALAT1         | hsa-miR-199a-3p;hsa- TMEM18     |
| LINC00667      | hsa-miR-181a-5p;hsa- EPS8       |
| MALAT1         | hsa-miR-106b-5p;hsa- VT1A       |
| MAPKAPK5-AS1   | hsa-miR-129-5p;hsa-r ADAM17     |
| RP11-631N16.2  | hsa-miR-106a-5p;hsa- RABGAP1L   |
| RP11-332H14.2  | hsa-miR-30a-5p;hsa-r EPG5       |
| RP11-488L18.10 | hsa-let-7a-5p;hsa-let- TGOLN2   |
| FTX            | hsa-let-7a-5p;hsa-let- TGOLN2   |
| NEAT1          | hsa-let-7a-3p;hsa-let- ZNF256   |
| C1orf132       | hsa-miR-126-5p;hsa-r HNRNPDL    |
| MALAT1         | hsa-miR-181a-5p;hsa- LPCAT1     |
| NEAT1          | hsa-miR-124-3p;hsa-r GTF2E1     |
| MALAT1         | hsa-miR-124-3p;hsa-r GTF2E1     |
| MALAT1         | hsa-miR-27a-3p;hsa-r CFDP1      |
| NORAD          | hsa-miR-140-3p;hsa-r DDAH1      |
| XIST           | hsa-let-7a-5p;hsa-let- MSI2     |
| PWAR6          | hsa-miR-143-3p;hsa-r VOPP1      |
| MALAT1         | hsa-miR-298;hsa-miR- VPS37A     |
| XIST           | hsa-miR-106b-5p;hsa- USP16      |
| MALAT1         | hsa-miR-106b-5p;hsa- USP16      |
| NORAD          | hsa-miR-1277-5p;hsa- NPTN       |
| PWAR6          | hsa-miR-17-5p;hsa-mi EIF4A2     |
| RP11-488L18.10 | hsa-let-7a-5p;hsa-let- PAFAH2   |
| RP11-488L18.10 | hsa-let-7a-5p;hsa-let- AHCYL2   |
| C1orf132       | hsa-let-7a-5p;hsa-let- TMED4    |
| MALAT1         | hsa-miR-103a-3p;hsa- ELK4       |

|                |                                 |
|----------------|---------------------------------|
| RP11-332H14.2  | hsa-miR-30a-5p;hsa-rr EPB41     |
| LINC00667      | hsa-miR-181a-5p;hsa- EFCAB14    |
| MIRLET7BHG     | hsa-miR-221-5p;hsa-rr PDXK      |
| FTX            | hsa-let-7a-5p;hsa-let- TRAPPC10 |
| LINC01355      | hsa-miR-15a-5p;hsa-rr VAV2      |
| RP11-458F8.4   | hsa-let-7a-5p;hsa-let- C19orf47 |
| RP11-488L18.10 | hsa-let-7a-5p;hsa-let- C19orf47 |
| C1orf132       | hsa-let-7a-5p;hsa-let- IL6R     |
| RP11-488L18.10 | hsa-let-7a-5p;hsa-let- IKZF3    |
| RP11-488L18.10 | hsa-let-7a-5p;hsa-let- FMNL3    |
| PWAR6          | hsa-miR-15a-5p;hsa-rr RACGAP1   |
| SNHG8          | hsa-miR-124-3p;hsa-rr RAVER2    |
| RP11-631N16.2  | hsa-miR-106a-5p;hsa- LZIC       |
| LINC00667      | hsa-miR-103a-3p;hsa- REL        |
| LINC00910      | hsa-let-7a-5p;hsa-let- PDLIM5   |
| LINC00969      | hsa-miR-129-5p;hsa-rr CDC42EP3  |
| MEG3           | hsa-miR-106a-5p;hsa- ICA1L      |
| LINC00667      | hsa-miR-181a-5p;hsa- TOPBP1     |
| LINC00667      | hsa-miR-106b-5p;hsa- FYCO1      |
| RP11-488L18.10 | hsa-miR-181a-5p;hsa- PBRM1      |
| MALAT1         | hsa-miR-181a-5p;hsa- PBRM1      |
| XIST           | hsa-miR-103a-3p;hsa- RNF168     |
| XIST           | hsa-miR-186-5p;hsa-rr AIMP1     |
| MALAT1         | hsa-let-7a-5p;hsa-let- MFSD8    |
| RP11-78O7.2    | hsa-let-7a-5p;hsa-let- MFSD8    |
| RP11-284N8.3   | hsa-miR-19a-3p;hsa-rr OTUD4     |
| XIST           | hsa-miR-101-5p;hsa-rr TMEM161B  |
| NORAD          | hsa-miR-106a-5p;hsa- ANKRD33B   |
| RP11-332H14.2  | hsa-miR-30a-5p;hsa-rr CASP3     |
| NEAT1          | hsa-miR-106b-5p;hsa- ERAP1      |
| RP11-332H14.2  | hsa-miR-30a-5p;hsa-rr ANKRA2    |
| RP11-631N16.2  | hsa-miR-106b-5p;hsa- BMT2       |
| NORAD          | hsa-miR-204-5p;hsa-rr KIAA1324L |
| LINC00106      | hsa-miR-17-3p;hsa-mi FOXK1      |
| NORAD          | hsa-let-7a-5p;hsa-let- YWHAZ    |
| MALAT1         | hsa-miR-183-3p;hsa-rr INTS8     |
| LINC00667      | hsa-miR-181a-5p;hsa- KIAA0196   |
| MALAT1         | hsa-miR-106a-5p;hsa- ARHGAP12   |
| XIST           | hsa-miR-106a-5p;hsa- ARHGAP12   |
| LINC00467      | hsa-miR-130a-3p;hsa- KBTBD6     |
| RP11-631N16.2  | hsa-miR-30a-5p;hsa-rr KBTBD6    |
| RP11-488L18.10 | hsa-let-7a-5p;hsa-let- NSD1     |
| PVT1           | hsa-miR-27a-3p;hsa-rr NSD1      |
| RP11-488L18.10 | hsa-let-7a-5p;hsa-let- PMPCA    |
| FTX            | hsa-let-7a-5p;hsa-let- PMPCA    |
| RP11-67L2.2    | hsa-miR-25-3p;hsa-mi MOAP1      |
| C17orf100      | hsa-let-7a-5p;hsa-let- POLL     |
| PWAR6          | hsa-miR-101-3p;hsa-rr SGPL1     |
| NEAT1          | hsa-miR-106a-5p;hsa- FRS2       |
| MALAT1         | hsa-miR-106a-5p;hsa- FRS2       |
| RP11-631N16.2  | hsa-miR-106a-5p;hsa- PRKCB      |
| RP11-332H14.2  | hsa-miR-30a-5p;hsa-rr SLFN5     |
| RP11-284N8.3   | hsa-miR-23a-3p;hsa-rr TMEM170A  |
| NEAT1          | hsa-miR-145-3p;hsa-rr SMAD3     |



|                |                                 |
|----------------|---------------------------------|
| MALAT1         | hsa-miR-106b-5p;hsa- AKTIP      |
| LINC00667      | hsa-miR-106b-5p;hsa- FAM102A    |
| SNHG8          | hsa-miR-19a-3p;hsa-rr CERCAM    |
| PWAR6          | hsa-miR-17-5p;hsa-mi CERCAM     |
| MALAT1         | hsa-miR-106a-5p;hsa- CRK        |
| LINC01355      | hsa-miR-101-5p;hsa-rr TMEM68    |
| LINC00667      | hsa-miR-106b-5p;hsa- ZNF597     |
| RP11-67L2.2    | hsa-miR-25-3p;hsa-mi RBPJ       |
| RP11-631N16.2  | hsa-miR-20a-5p;hsa-rr IRF2      |
| C1orf132       | hsa-let-7a-5p;hsa-let- SEMA4C   |
| NORAD          | hsa-let-7a-5p;hsa-let- ZBTB5    |
| LINC00667      | hsa-miR-548ak;hsa-mil TNIP2     |
| RP11-488L18.10 | hsa-let-7a-5p;hsa-let- CEP120   |
| SNHG8          | hsa-miR-19a-3p;hsa-rr MFF       |
| RP11-332H14.2  | hsa-miR-30b-5p;hsa-rr CSNK1G1   |
| NORAD          | hsa-miR-135a-5p;hsa- PTK2       |
| NORAD          | hsa-miR-101-3p;hsa-rr CLIC4     |
| MALAT1         | hsa-let-7d-5p;hsa-miR ZEB2      |
| XIST           | hsa-miR-148a-3p;hsa- ALCAM      |
| LINC01355      | hsa-miR-15a-5p;hsa-rr RALGAPB   |
| RP11-488L18.10 | hsa-let-7a-5p;hsa-let- STAT2    |
| NEAT1          | hsa-let-7a-5p;hsa-let- STAT2    |
| XIST           | hsa-miR-106a-5p;hsa- USP32      |
| LINC01355      | hsa-miR-15a-5p;hsa-rr MSANTD4   |
| RP11-498C9.15  | hsa-miR-30b-5p;hsa-rr MSANTD4   |
| FTX            | hsa-miR-17-5p;hsa-mi MCC        |
| RP11-498C9.15  | hsa-miR-106a-5p;hsa- MCC        |
| LINC01355      | hsa-miR-15a-5p;hsa-rr ASXL1     |
| PWAR6          | hsa-miR-15a-5p;hsa-rr PLRG1     |
| MALAT1         | hsa-miR-1304-3p;hsa- ATF7IP     |
| NEAT1          | hsa-miR-1304-3p;hsa- ATF7IP     |
| PWAR6          | hsa-miR-125b-5p;hsa- BCL2       |
| XIST           | hsa-miR-103a-3p;hsa- PTEN       |
| C1orf132       | hsa-miR-1299;hsa-miR BSG        |
| RP11-488L18.10 | hsa-let-7a-5p;hsa-let- FNDC9    |
| C1orf132       | hsa-let-7a-5p;hsa-let- FUT10    |
| RP11-67L2.2    | hsa-let-7d-5p;hsa-miR FUT10     |
| LINC00667      | hsa-miR-181a-5p;hsa- FAM192A    |
| C1orf132       | hsa-miR-124-3p;hsa-rr TADA2B    |
| MALAT1         | hsa-miR-129-5p;hsa-rr PARP15    |
| RP11-332H14.2  | hsa-miR-30a-5p;hsa-rr IQCB1     |
| XIST           | hsa-let-7a-5p;hsa-let- NAA20    |
| RP11-67L2.2    | hsa-let-7d-5p;hsa-miR ZNF417    |
| GS1-124K5.11   | hsa-miR-15a-5p;hsa-rr ZNF622    |
| LINC00969      | hsa-miR-15a-5p;hsa-rr ZNF622    |
| MALAT1         | hsa-miR-129-5p;hsa-rr HEG1      |
| MALAT1         | hsa-miR-15a-5p;hsa-rr PHC3      |
| RP11-332H14.2  | hsa-miR-30b-5p;hsa-rr ATP2A2    |
| LINC00467      | hsa-miR-27a-3p;hsa-rr GCSAM     |
| LINC01355      | hsa-miR-27a-3p;hsa-rr GCSAM     |
| XIST           | hsa-let-7a-5p;hsa-let- CEP135   |
| LINC01355      | hsa-miR-15a-5p;hsa-rr KLC2      |
| LINC00910      | hsa-let-7a-5p;hsa-let- MARCKSL1 |
| RP11-67L2.2    | hsa-miR-25-3p;hsa-mi GOLGA8A    |

|                |                                |
|----------------|--------------------------------|
| RP11-67L2.2    | hsa-miR-137;hsa-miR- LONRF3    |
| XIST           | hsa-let-7a-5p;hsa-let- ZBTB8OS |
| PWAR6          | hsa-miR-145-5p;hsa-rr RPS6KA3  |
| MALAT1         | hsa-miR-106a-5p;hsa- NR2C2     |
| MIRLET7BHG     | hsa-miR-221-5p;hsa-rr AGTRAP   |
| RP11-332H14.2  | hsa-miR-30a-5p;hsa-rr FUCA1    |
| NEAT1          | hsa-miR-30a-5p;hsa-rr FUCA1    |
| NORAD          | hsa-miR-29a-3p;hsa-rr ZFPM1    |
| RP11-631N16.2  | hsa-miR-519a-3p;hsa- PAK2      |
| NEAT1          | hsa-miR-1271-5p;hsa- MIGA1     |
| LINC00667      | hsa-miR-106b-5p;hsa- YOD1      |
| XIST           | hsa-miR-106b-5p;hsa- CMTR2     |
| RP11-67L2.2    | hsa-miR-25-3p;hsa-mi AEN       |
| MALAT1         | hsa-miR-1306-5p;hsa- ZBTB20    |
| NEAT1          | hsa-miR-19a-3p;hsa-rr ZNF721   |
| LINC01355      | hsa-miR-30a-5p;hsa-rr FANCF    |
| LINC00969      | hsa-miR-15a-5p;hsa-rr SMDT1    |
| NEAT1          | hsa-let-7a-3p;hsa-let- RBM12B  |
| FTX            | hsa-let-7a-5p;hsa-let- RBM12B  |
| NEAT1          | hsa-miR-15a-5p;hsa-rr VPS33B   |
| RP11-78O7.2    | hsa-let-7a-5p;hsa-let- BRI3BP  |
| RP11-488L18.10 | hsa-let-7a-5p;hsa-let- ZBTB37  |
| GS1-124K5.11   | hsa-miR-212-5p;hsa-rr SP140L   |
| MALAT1         | hsa-miR-124-3p;hsa-rr SP1      |
| LINC00106      | hsa-miR-124-3p;hsa-rr SP1      |
| PWAR6          | hsa-miR-15a-5p;hsa-rr ZNF267   |
| LINC01355      | hsa-miR-15a-5p;hsa-rr GPATCH8  |
| NEAT1          | hsa-miR-124-3p;hsa-rr GPATCH8  |
| MIR222HG       | hsa-miR-26a-5p;hsa-rr UBE2H    |
| C17orf100      | hsa-let-7a-5p;hsa-let- RHD     |
| PKI55          | hsa-let-7a-5p;hsa-let- RHD     |
| NORAD          | hsa-let-7a-5p;hsa-let- NAP1L1  |
| RP11-332H14.2  | hsa-miR-30a-5p;hsa-rr PTAR1    |
| PWAR6          | hsa-miR-15a-5p;hsa-rr RPL14    |
| MALAT1         | hsa-miR-15a-5p;hsa-rr MSL1     |
| LL22NC03-2H8.5 | hsa-let-7a-5p;hsa-let- RNFT1   |
| RP11-67L2.2    | hsa-miR-25-3p;hsa-mi NUGGC     |
| LINC01355      | hsa-miR-15a-5p;hsa-rr SLC35E2B |
| LINC00667      | hsa-miR-181a-5p;hsa- BLOC1S2   |
| RP11-332H14.2  | hsa-miR-1224-3p;hsa- ZNF699    |
| RP11-67L2.2    | hsa-miR-101-5p;hsa-rr LCOR     |
| FTX            | hsa-miR-17-5p;hsa-mi ZNF107    |
| PWAR6          | hsa-miR-101-3p;hsa-rr TSC22D2  |
| PKI55          | hsa-let-7a-5p;hsa-let- ZNF799  |
| XIST           | hsa-miR-107;hsa-miR- NF1       |
| MIRLET7BHG     | hsa-miR-24-3p;hsa-mi PPTC7     |
| RP11-488L18.10 | hsa-let-7a-5p;hsa-let- NHLRC2  |
| RP11-498C9.15  | hsa-miR-548am-5p;hsa- FAM3C    |
| RP11-67L2.2    | hsa-miR-137;hsa-miR- FUT11     |
| CTD-2587M2.1   | hsa-miR-25-3p;hsa-mi IPP       |
| RP11-631N16.2  | hsa-miR-106a-5p;hsa- RPF2      |
| XIST           | hsa-miR-106b-5p;hsa- TOPORS    |
| RP11-488L18.10 | hsa-let-7a-5p;hsa-let- ZNF460  |
| MIRLET7BHG     | hsa-miR-24-3p;hsa-mi SGTB      |

|                |                                     |
|----------------|-------------------------------------|
| RP11-67L2.2    | hsa-miR-25-3p;hsa-mi FAM49A         |
| MEG3           | hsa-miR-106a-5p;hsa- NKIRAS1        |
| NORAD          | hsa-let-7a-5p;hsa-let- HIST1H2BK    |
| RP11-78O7.2    | hsa-let-7a-5p;hsa-let- PLCG2        |
| MALAT1         | hsa-miR-126-5p;hsa-rr ITSN2         |
| NEAT1          | hsa-let-7a-3p;hsa-let- ZNF652       |
| RP11-67L2.2    | hsa-miR-25-3p;hsa-mi TMEM184B       |
| NEAT1          | hsa-miR-125a-5p;hsa- MTOR           |
| XIST           | hsa-miR-1224-5p;hsa- ZNF277         |
| RP11-701H24.4  | hsa-miR-106a-5p;hsa- FICD           |
| NEAT1          | hsa-miR-106a-5p;hsa- FICD           |
| NORAD          | hsa-miR-106a-5p;hsa- CAPZA2         |
| RP11-67L2.2    | hsa-miR-25-3p;hsa-mi TATDN3         |
| PKI55          | hsa-let-7a-5p;hsa-let- PHACTR4      |
| FTX            | hsa-let-7a-5p;hsa-let- PHACTR4      |
| RP11-78O7.2    | hsa-let-7a-5p;hsa-let- PBX2         |
| RP11-67L2.2    | hsa-miR-25-3p;hsa-mi TBC1D8         |
| RP11-488L18.10 | hsa-let-7a-5p;hsa-let- ATXN2        |
| RP11-631N16.2  | hsa-miR-106b-5p;hsa- FBXO48         |
| LINC00969      | hsa-miR-1283;hsa-miR C5orf51        |
| XIST           | hsa-let-7a-5p;hsa-let- NRAS         |
| XIST           | hsa-miR-15a-5p;hsa-rr CHUK          |
| MALAT1         | hsa-miR-15a-5p;hsa-rr CPNE1         |
| RP11-332H14.2  | hsa-miR-378a-3p;hsa- HAUS3          |
| LINC00910      | hsa-let-7a-5p;hsa-let- UBXN2B       |
| RP11-458F8.4   | hsa-let-7a-5p;hsa-let- TIAF1        |
| RP11-631N16.2  | hsa-miR-106a-5p;hsa- SMIM13         |
| RP11-701H24.4  | hsa-miR-106a-5p;hsa- CDKN2AIPNL     |
| NEAT1          | hsa-miR-106a-5p;hsa- CDKN2AIPNL     |
| XIST           | hsa-miR-21-5p;hsa-mi RNF103         |
| GS1-124K5.11   | hsa-miR-15a-5p;hsa-rr PISD          |
| RP11-67L2.2    | hsa-miR-25-3p;hsa-mi C15orf38-AP3S2 |
| NORAD          | hsa-miR-106a-5p;hsa- CCDC71L        |
| NEAT1          | hsa-miR-130a-3p;hsa- ZNF224         |
| LINC00969      | hsa-miR-129-5p;hsa-rr MLLT6         |
| MALAT1         | hsa-miR-103a-3p;hsa- SYNRG          |
| XIST           | hsa-let-7b-5p;hsa-miR UHRF1         |

| lncRNA         | miRNAs            | mRNA    |
|----------------|-------------------|---------|
| RP11-631N16.2  | hsa-miR-106a-5p;  | M6PR    |
| RNU12          | hsa-miR-17-5p;hs  | VPS50   |
| RP11-631N16.2  | hsa-miR-106a-5p;  | VPS50   |
| LINC00667      | hsa-miR-103a-3p;  | DHX33   |
| RP11-488L18.10 | hsa-let-7a-5p;hsa | ITGA3   |
| RP11-78O7.2    | hsa-let-7a-5p;hsa | ITGA3   |
| PKI55          | hsa-let-7a-5p;hsa | ITGA3   |
| RP11-1055B8.4  | hsa-miR-199a-3p;  | ITGA3   |
| AC009404.2     | hsa-let-7a-5p;hsa | ITGA3   |
| RP11-121C2.2   | hsa-let-7a-5p;hsa | ITGA3   |
| RNU12          | hsa-miR-17-5p;hs  | MAP3K14 |
| LINC00667      | hsa-miR-106b-5p;  | MAP3K14 |
| RP11-631N16.2  | hsa-miR-106b-5p;  | MAP3K14 |
| MIRLET7BHG     | hsa-miR-30c-1-3p  | TBXA2R  |
| MEG3           | hsa-miR-106b-5p;  | PNPLA4  |
| RP11-701H24.4  | hsa-miR-125b-5p;  | E2F2    |
| RP11-121C2.2   | hsa-let-7a-5p;hsa | E2F2    |
| PWAR6          | hsa-miR-125b-5p;  | E2F2    |
| MEG3           | hsa-let-7a-5p;hsa | E2F2    |
| PKI55          | hsa-let-7a-5p;hsa | E2F2    |
| LINC00969      | hsa-miR-15a-5p;h  | SYPL1   |
| RP11-332H14.2  | hsa-miR-30a-5p;h  | CELSR3  |
| RP11-121C2.2   | hsa-miR-548ak;hs; | CELSR3  |
| RNU12          | hsa-miR-548a-5p;  | PKD1    |
| RP11-498C9.15  | hsa-miR-377-3p;h  | PKD1    |
| RP11-631N16.2  | hsa-miR-106b-5p;  | NCAPD2  |
| RP11-631N16.2  | hsa-miR-1277-5p;  | RABGAP1 |
| RNU12          | hsa-miR-15a-5p;h  | BRCA1   |
| RNU12          | hsa-miR-150-5p;h  | MAN2B2  |
| RP11-631N16.2  | hsa-miR-106a-5p;  | MAN2B2  |
| LINC00467      | hsa-miR-130a-3p;  | RRAGD   |
| RP11-701H24.4  | hsa-miR-106a-5p;  | RRAGD   |
| SNHG8          | hsa-miR-19a-3p;h  | RRAGD   |
| MEG3           | hsa-miR-106a-5p;  | RRAGD   |
| PWAR6          | hsa-miR-17-5p;hs  | RRAGD   |
| LINC00630      | hsa-miR-25-3p;hs  | B4GALT7 |
| CTD-2587M2.1   | hsa-miR-25-3p;hs  | B4GALT7 |
| RP11-631N16.2  | hsa-miR-1277-5p;  | TBPL1   |
| LINC00667      | hsa-miR-103a-3p;  | TBPL1   |
| PWAR6          | hsa-miR-15a-5p;h  | TFB1M   |
| LINC01355      | hsa-miR-15a-5p;h  | TFB1M   |
| GS1-124K5.11   | hsa-miR-15a-5p;h  | TFB1M   |
| PKI55          | hsa-miR-15a-5p;h  | TFB1M   |
| MEG3           | hsa-miR-15a-5p;h  | TFB1M   |
| PKI55          | hsa-miR-21-5p;hs  | FAM136A |
| LINC00969      | hsa-miR-15a-5p;h  | PHLPP2  |
| RNU12          | hsa-miR-15a-5p;h  | PHLPP2  |
| RP11-631N16.2  | hsa-miR-106b-5p;  | PHLPP2  |
| RP11-701H24.4  | hsa-miR-106a-5p;  | GEMIN8  |
| MEG3           | hsa-miR-106a-5p;  | GEMIN8  |
| RP11-121C2.2   | hsa-let-7a-5p;hsa | C12orf4 |
| RP11-488L18.10 | hsa-let-7a-5p;hsa | C12orf4 |
| AC009404.2     | hsa-let-7a-5p;hsa | C12orf4 |
| PKI55          | hsa-let-7a-5p;hsa | C12orf4 |
| RP11-78O7.2    | hsa-let-7a-5p;hsa | C12orf4 |
| RP11-631N16.2  | hsa-miR-106b-5p;  | USP28   |
| LINC00467      | hsa-miR-130a-3p;  | RFC2    |

|                |                           |
|----------------|---------------------------|
| RP11-78O7.2    | hsa-let-7a-5p;hsa RFC2    |
| RP11-121C2.2   | hsa-let-7a-5p;hsa RFC2    |
| AC009404.2     | hsa-let-7a-5p;hsa RFC2    |
| RP11-488L18.10 | hsa-let-7a-5p;hsa RFC2    |
| RP11-631N16.2  | hsa-miR-519a-3p; MCUR1    |
| RP11-701H24.4  | hsa-miR-106a-5p; TNIP3    |
| MEG3           | hsa-miR-106a-5p; TNIP3    |
| RP11-631N16.2  | hsa-miR-106b-5p; SIKE1    |
| LINC00667      | hsa-miR-106b-5p; SIKE1    |
| GS1-124K5.11   | hsa-miR-30c-1-3p; MCF2L2  |
| AC009404.2     | hsa-let-7a-5p;hsa MCF2L2  |
| RP11-488L18.10 | hsa-let-7a-5p;hsa MCF2L2  |
| RP11-121C2.2   | hsa-let-7a-5p;hsa MCF2L2  |
| LINC00630      | hsa-miR-25-3p;hs MCF2L2   |
| MEG3           | hsa-let-7a-5p;hsa MCF2L2  |
| CTD-2587M2.1   | hsa-miR-25-3p;hs MCF2L2   |
| RP11-78O7.2    | hsa-let-7a-5p;hsa MCF2L2  |
| MIRLET7BHG     | hsa-miR-30c-1-3p; MCF2L2  |
| MIRLET7BHG     | hsa-miR-24-3p;hs PLEKHH1  |
| RP11-631N16.2  | hsa-miR-106b-5p; ZNF280C  |
| RP11-701H24.4  | hsa-miR-106a-5p; TRAF3IP2 |
| MEG3           | hsa-miR-106a-5p; TRAF3IP2 |
| SNHG8          | hsa-miR-197-3p;h DCBLD2   |
| LINC00467      | hsa-miR-130a-3p; DCBLD2   |
| RP11-79H23.3   | hsa-miR-181a-5p; DCBLD2   |
| RP11-701H24.4  | hsa-miR-101-3p;h DCBLD2   |
| MEG3           | hsa-miR-106b-5p; DCBLD2   |
| PWAR6          | hsa-miR-101-3p;h DCBLD2   |
| PKI55          | hsa-miR-101-3p;h DCBLD2   |
| LINC00667      | hsa-miR-19a-3p;h ATG5     |
| LINC00969      | hsa-miR-15a-5p;h TM7SF3   |
| RP11-332H14.2  | hsa-miR-378a-3p; SPA17    |
| RP11-631N16.2  | hsa-miR-106b-5p; RFXANK   |
| RP11-631N16.2  | hsa-miR-30a-5p;h BTBD1    |
| RP11-352M15.2  | hsa-miR-126-5p;h BTBD1    |
| RP11-631N16.2  | hsa-miR-30a-5p;h UHRF1BP1 |
| RP11-498C9.15  | hsa-miR-548am-5 MAP2K4    |
| RNU12          | hsa-miR-10a-3p;h MAP2K4   |
| RP11-631N16.2  | hsa-miR-30a-5p;h SEC61A2  |
| RP11-701H24.4  | hsa-miR-106a-5p; ISOC1    |
| MEG3           | hsa-miR-106a-5p; ISOC1    |
| MIRLET7BHG     | hsa-miR-188-3p;h SDK2     |
| LL22NC03-2H8.5 | hsa-let-7a-5p;hsa NUCB2   |
| PWAR6          | hsa-miR-19a-3p;h PFN2     |
| LINC01355      | hsa-miR-30a-5p;h VASH1    |
| RP11-332H14.2  | hsa-miR-30a-5p;h VASH1    |
| RP11-631N16.2  | hsa-miR-106a-5p; TXK      |
| RNU12          | hsa-miR-150-5p;h TXK      |
| CTD-2587M2.1   | hsa-miR-137;hsa- GRAMD4   |
| LINC00630      | hsa-miR-25-3p;hs GRAMD4   |
| LINC00667      | hsa-miR-19a-3p;h UBE2A    |
| RP11-332H14.2  | hsa-miR-30a-5p;h OPHN1    |
| LINC01355      | hsa-miR-30a-5p;h OPHN1    |
| LL22NC03-2H8.5 | hsa-let-7a-5p;hsa RABL2B  |
| LINC00667      | hsa-miR-181a-5p; ATP8B1   |
| LL22NC03-2H8.5 | hsa-let-7a-5p;hsa NOA1    |
| CTD-2587M2.1   | hsa-miR-25-3p;hs AGBL5    |
| LINC00630      | hsa-miR-25-3p;hs AGBL5    |

|                |                            |
|----------------|----------------------------|
| RP11-78O7.2    | hsa-let-7a-5p;hsa CD59     |
| PKI55          | hsa-let-7a-5p;hsa CD59     |
| RP11-121C2.2   | hsa-let-7a-5p;hsa CD59     |
| AC009404.2     | hsa-let-7a-5p;hsa CD59     |
| RP11-488L18.10 | hsa-let-7a-5p;hsa CD59     |
| LINC00467      | hsa-miR-130a-3p; CHERP     |
| RP11-631N16.2  | hsa-miR-1277-5p; NLK       |
| LINC01355      | hsa-miR-101-3p;h L2HGDH    |
| GS1-124K5.11   | hsa-miR-103a-3p; L2HGDH    |
| PKI55          | hsa-miR-101-3p;h L2HGDH    |
| RP11-121C2.2   | hsa-miR-548ak;hs; KHSRP    |
| RP11-701H24.4  | hsa-miR-106a-5p; PDRG1     |
| SNHG8          | hsa-miR-18a-3p;h PDRG1     |
| LINC00969      | hsa-miR-137;hsa- FKBP1A    |
| RP11-631N16.2  | hsa-miR-1277-5p; FKBP1A    |
| LINC00667      | hsa-miR-181a-5p; FKBP1A    |
| GS1-124K5.11   | hsa-miR-15a-5p;h TASP1     |
| LINC01355      | hsa-miR-15a-5p;h TASP1     |
| PKI55          | hsa-miR-15a-5p;h TASP1     |
| PWAR6          | hsa-miR-15a-5p;h TASP1     |
| MEG3           | hsa-miR-15a-5p;h TASP1     |
| RP11-701H24.4  | hsa-miR-16-1-3p; TFAP4     |
| RNU12          | hsa-miR-130a-5p; ZNF268    |
| RP11-631N16.2  | hsa-miR-30a-5p;h SEMA6A    |
| LINC00667      | hsa-miR-103a-3p; SEMA6A    |
| MEG3           | hsa-miR-149-3p;h CLSPN     |
| PKI55          | hsa-miR-15a-5p;h CLSPN     |
| LINC01355      | hsa-miR-15a-5p;h CLSPN     |
| GS1-124K5.11   | hsa-miR-15a-5p;h CLSPN     |
| LL22NC03-2H8.5 | hsa-let-7a-5p;hsa ECHDC1   |
| LINC00969      | hsa-miR-200b-3p; ERMP1     |
| RP11-1055B8.4  | hsa-miR-199a-5p; POLR2F    |
| RP11-631N16.2  | hsa-miR-30a-5p;h SBF1      |
| RP11-78O7.2    | hsa-let-7a-5p;hsa PDGFB    |
| RP11-701H24.4  | hsa-miR-106a-5p; PDGFB     |
| RP11-488L18.10 | hsa-let-7a-5p;hsa PDGFB    |
| RP11-121C2.2   | hsa-let-7a-5p;hsa PDGFB    |
| AC009404.2     | hsa-let-7a-5p;hsa PDGFB    |
| PKI55          | hsa-let-7a-5p;hsa PDGFB    |
| MEG3           | hsa-let-7a-5p;hsa PDGFB    |
| RP11-701H24.4  | hsa-miR-106a-5p; FOXRED2   |
| LL22NC03-2H8.5 | hsa-let-7a-5p;hsa KIAA0930 |
| RP11-631N16.2  | hsa-miR-106b-5p; VCPKMT    |
| LINC00969      | hsa-miR-10a-3p;h GNPAT1    |
| RP11-631N16.2  | hsa-miR-106a-5p; ZFYVE21   |
| RP11-498C9.15  | hsa-miR-548am-5 MTHFD1     |
| RNU12          | hsa-miR-548a-5p; MTHFD1    |
| RP11-79H23.3   | hsa-miR-181a-5p; GSKIP     |
| PWAR6          | hsa-miR-132-3p;h MMP9      |
| PKI55          | hsa-miR-132-3p;h MMP9      |
| MEG3           | hsa-miR-132-3p;h MMP9      |
| RP11-701H24.4  | hsa-miR-519a-3p; ABHD12    |
| MEG3           | hsa-let-7g-3p;hsa ABHD12   |
| LINC01355      | hsa-miR-30a-5p;h MYBL2     |
| RP11-332H14.2  | hsa-miR-30a-5p;h MYBL2     |
| RP11-701H24.4  | hsa-miR-519a-3p; SEC23B    |
| RP11-498C9.15  | hsa-miR-548am-5 CRNKL1     |
| RNU12          | hsa-miR-3613-3p; CRNKL1    |

|                |                            |
|----------------|----------------------------|
| LINC00969      | hsa-miR-15a-5p;h RPRD1B    |
| RNU12          | hsa-miR-130a-5p; STS       |
| LL22NC03-2H8.5 | hsa-let-7a-5p;hsa PGRMC1   |
| LINC00467      | hsa-miR-130a-3p; NKAP      |
| CTD-2587M2.1   | hsa-miR-25-3p;hs NKAP      |
| LINC00630      | hsa-miR-25-3p;hs NKAP      |
| RP11-631N16.2  | hsa-miR-106b-5p; RBBP7     |
| LINC00969      | hsa-miR-15a-5p;h KPNA3     |
| RNU12          | hsa-miR-15a-5p;h KPNA3     |
| RP11-631N16.2  | hsa-miR-106a-5p; KATNAL1   |
| LINC00667      | hsa-miR-19a-3p;h KATNAL1   |
| RP11-498C9.15  | hsa-miR-106a-5p; KATNAL1   |
| RNU12          | hsa-miR-15a-5p;h KATNAL1   |
| RP11-1055B8.4  | hsa-miR-30b-3p;h PLLP      |
| RP11-631N16.2  | hsa-miR-106a-5p; DHODH     |
| RP11-78O7.2    | hsa-let-7a-5p;hsa SLC38A7  |
| RP11-332H14.2  | hsa-miR-30a-5p;h SLC38A7   |
| RP11-121C2.2   | hsa-let-7a-5p;hsa SLC38A7  |
| MEG3           | hsa-let-7a-5p;hsa SLC38A7  |
| RP11-488L18.10 | hsa-let-7a-5p;hsa SLC38A7  |
| LINC01355      | hsa-miR-193b-5p; SLC38A7   |
| AC009404.2     | hsa-let-7a-5p;hsa SLC38A7  |
| RP11-701H24.4  | hsa-miR-519a-3p; HAS3      |
| MEG3           | hsa-miR-106a-5p; ZNF174    |
| RP11-701H24.4  | hsa-miR-106a-5p; ZNF174    |
| RNU12          | hsa-miR-15a-5p;h USP31     |
| LINC00969      | hsa-miR-15a-5p;h USP31     |
| RP11-631N16.2  | hsa-miR-106a-5p; STX4      |
| MEG3           | hsa-miR-214-3p;h HOMER2    |
| LINC00969      | hsa-miR-194-3p;h EMC2      |
| GS1-124K5.11   | hsa-miR-15a-5p;h SNX16     |
| RP11-631N16.2  | hsa-miR-106a-5p; MTMR9     |
| RNU12          | hsa-miR-150-5p;h MTMR9     |
| RP11-631N16.2  | hsa-miR-106a-5p; DCTN6     |
| MEG3           | hsa-let-7b-5p;hsa GYS1     |
| LINC00969      | hsa-miR-15a-5p;h DMPK      |
| RNU12          | hsa-miR-15a-5p;h DMPK      |
| RP11-488L18.10 | hsa-let-7a-5p;hsa C19orf53 |
| AC009404.2     | hsa-let-7a-5p;hsa C19orf53 |
| RP11-121C2.2   | hsa-let-7a-5p;hsa C19orf53 |
| PKI55          | hsa-let-7a-5p;hsa C19orf53 |
| RP11-78O7.2    | hsa-let-7a-5p;hsa C19orf53 |
| GS1-124K5.11   | hsa-miR-15a-5p;h CCNE1     |
| PKI55          | hsa-miR-15a-5p;h CCNE1     |
| MEG3           | hsa-miR-15a-5p;h CCNE1     |
| PWAR6          | hsa-miR-15a-5p;h CCNE1     |
| LINC01355      | hsa-miR-15a-5p;h CCNE1     |
| RP11-1055B8.4  | hsa-miR-125a-3p; TIMM50    |
| LINC00467      | hsa-miR-130a-3p; TIMM50    |
| RP11-78O7.2    | hsa-let-7a-5p;hsa PLD3     |
| RP11-488L18.10 | hsa-let-7a-5p;hsa PLD3     |
| PKI55          | hsa-let-7a-5p;hsa PLD3     |
| RP11-1055B8.4  | hsa-miR-185-5p;h PLD3      |
| RP11-121C2.2   | hsa-let-7a-5p;hsa PLD3     |
| AC009404.2     | hsa-let-7a-5p;hsa PLD3     |
| MEG3           | hsa-miR-106a-5p; SLC1A5    |
| SNHG8          | hsa-miR-186-3p;h DNASE2    |
| MEG3           | hsa-miR-106a-5p; SUGP1     |

|                |                            |
|----------------|----------------------------|
| PWAR6          | hsa-miR-17-5p;hs SUGP1     |
| RP11-701H24.4  | hsa-miR-106a-5p; SUGP1     |
| LINC00630      | hsa-miR-25-3p;hs ITGB8     |
| CTD-2587M2.1   | hsa-miR-25-3p;hs ITGB8     |
| RNU12          | hsa-miR-130a-5p; MPP6      |
| RP11-631N16.2  | hsa-miR-106a-5p; FKBP14    |
| LL22NC03-2H8.5 | hsa-let-7a-5p;hsa AP1S1    |
| LINC00969      | hsa-miR-200b-3p; PHF14     |
| RP11-631N16.2  | hsa-miR-519a-3p; LIMK1     |
| MEG3           | hsa-miR-136-5p;h FSD1L     |
| RP11-79H23.3   | hsa-miR-181a-5p; FSD1L     |
| LINC00667      | hsa-miR-181a-5p; TBC1D13   |
| RNU12          | hsa-miR-15b-3p;h TBC1D13   |
| RP11-498C9.15  | hsa-miR-125a-3p; TBC1D13   |
| RP11-631N16.2  | hsa-miR-181a-5p; TBC1D13   |
| RNU12          | hsa-miR-15a-5p;h KANK1     |
| LINC00969      | hsa-miR-15a-5p;h KANK1     |
| RNU12          | hsa-miR-15a-5p;h RAB11FIP2 |
| LINC00969      | hsa-miR-1-3p;hsa RAB11FIP2 |
| RP11-631N16.2  | hsa-miR-30a-5p;h PPP3CB    |
| RNU12          | hsa-miR-520h;hsa LIPA      |
| LINC00667      | hsa-miR-548ak;hs: LIPA     |
| RP11-498C9.15  | hsa-miR-548am-5 LIPA       |
| GS1-124K5.11   | hsa-miR-103a-3p; CPEB3     |
| MEG3           | hsa-miR-103a-3p; CPEB3     |
| PKI55          | hsa-miR-15a-5p;h CPEB3     |
| PWAR6          | hsa-miR-15a-5p;h CPEB3     |
| LINC01355      | hsa-miR-15a-5p;h CPEB3     |
| CTD-2587M2.1   | hsa-miR-25-3p;hs CPEB3     |
| LINC00630      | hsa-miR-25-3p;hs CPEB3     |
| LINC00667      | hsa-miR-106b-5p; MTPAP     |
| RP11-631N16.2  | hsa-miR-106a-5p; MTPAP     |
| LINC01355      | hsa-miR-30a-5p;h SH3PXD2A  |
| AC004951.6     | hsa-miR-30a-3p;h SH3PXD2A  |
| RP11-332H14.2  | hsa-miR-30a-5p;h SH3PXD2A  |
| LINC00969      | hsa-miR-15a-5p;h MTMR4     |
| RNU12          | hsa-miR-15a-5p;h MTMR4     |
| RP11-631N16.2  | hsa-miR-106a-5p; CBX1      |
| LINC01006      | hsa-miR-23b-5p;h C17orf75  |
| RP11-701H24.4  | hsa-miR-106a-5p; C17orf75  |
| MEG3           | hsa-miR-106a-5p; C17orf75  |
| CTD-2587M2.1   | hsa-miR-25-3p;hs C17orf75  |
| LINC00630      | hsa-miR-25-3p;hs C17orf75  |
| RP11-78O7.2    | hsa-let-7a-5p;hsa TBC1D19  |
| RP11-121C2.2   | hsa-let-7a-5p;hsa TBC1D19  |
| RP11-488L18.10 | hsa-let-7a-5p;hsa TBC1D19  |
| AC009404.2     | hsa-let-7a-5p;hsa TBC1D19  |
| LINC00667      | hsa-miR-181a-5p; WHSC1     |
| RNU12          | hsa-miR-15a-5p;h ZBTB16    |
| LINC00969      | hsa-miR-15a-5p;h ZBTB16    |
| RP11-121C2.2   | hsa-miR-548ak;hs: PANX1    |
| MIRLET7BHG     | hsa-miR-29a-3p;h NAA40     |
| RP11-37B2.1    | hsa-let-7a-5p;hsa SLC11A2  |
| RNU12          | hsa-miR-15a-5p;h CREBL2    |
| RP11-701H24.4  | hsa-miR-106a-5p; GTF2H3    |
| LINC00667      | hsa-miR-181a-5p; STX2      |
| RNU12          | hsa-miR-130a-5p; USP5      |
| GS1-124K5.11   | hsa-miR-103a-3p; HCFC2     |



|                |                           |
|----------------|---------------------------|
| MEG3           | hsa-miR-103a-3p; HCFC2    |
| PWAR6          | hsa-miR-15a-5p;h HCFC2    |
| LINC01355      | hsa-miR-15a-5p;h HCFC2    |
| MEG3           | hsa-miR-214-5p;h BAG2     |
| RP11-631N16.2  | hsa-miR-106b-5p; E2F3     |
| LINC00667      | hsa-miR-106b-5p; E2F3     |
| RP11-352M15.2  | hsa-miR-21-5p;hs E2F3     |
| GS1-124K5.11   | hsa-miR-15a-5p;h SLC29A1  |
| RP11-701H24.4  | hsa-miR-106a-5p; ENPP5    |
| RP11-121C2.2   | hsa-miR-106a-5p; ENPP5    |
| MEG3           | hsa-miR-106a-5p; CEP72    |
| RP11-701H24.4  | hsa-miR-106a-5p; CEP72    |
| RNU12          | hsa-miR-1224-5p; LMNB1    |
| RP11-138A9.1   | hsa-miR-1224-5p; LMNB1    |
| LL22NC03-2H8.5 | hsa-let-7a-5p;hsa NUP155  |
| CTD-2587M2.1   | hsa-miR-25-3p;hs TXNDC15  |
| LINC00630      | hsa-miR-25-3p;hs TXNDC15  |
| MEG3           | hsa-miR-106a-5p; WWC1     |
| RP11-701H24.4  | hsa-miR-106a-5p; WWC1     |
| PKI55          | hsa-miR-15a-5p;h TBCCD1   |
| LINC01355      | hsa-miR-15a-5p;h TBCCD1   |
| GS1-124K5.11   | hsa-miR-15a-5p;h TBCCD1   |
| MEG3           | hsa-miR-106a-5p; MORC1    |
| RP11-701H24.4  | hsa-miR-106a-5p; MORC1    |
| RP11-631N16.2  | hsa-miR-106a-5p; SPCS1    |
| MEG3           | hsa-miR-106b-5p; DNAJC27  |
| LINC00969      | hsa-miR-148a-3p; ACVR1    |
| MEG3           | hsa-let-7a-5p;hsa SNX17   |
| RP11-121C2.2   | hsa-let-7a-5p;hsa SNX17   |
| AC009404.2     | hsa-let-7a-5p;hsa SNX17   |
| RP11-488L18.10 | hsa-let-7a-5p;hsa SNX17   |
| RP11-78O7.2    | hsa-let-7a-5p;hsa SNX17   |
| PKI55          | hsa-let-7a-5p;hsa SNX17   |
| LINC00969      | hsa-miR-15a-5p;h CLIP4    |
| RNU12          | hsa-miR-15a-5p;h CLIP4    |
| RP11-631N16.2  | hsa-miR-26a-5p;h GALNT3   |
| RNU12          | hsa-miR-15a-5p;h LANCL1   |
| LINC00969      | hsa-miR-15a-5p;h LANCL1   |
| MEG3           | hsa-miR-30a-5p;h FANCL    |
| LINC01355      | hsa-miR-30a-5p;h FANCL    |
| RP11-332H14.2  | hsa-miR-30a-5p;h FANCL    |
| RP11-631N16.2  | hsa-miR-30a-5p;h ST3GAL5  |
| RNU12          | hsa-miR-15a-5p;h SLC25A12 |
| LINC00969      | hsa-miR-15a-5p;h SLC25A12 |
| LINC00969      | hsa-miR-1225-5p; ORC4     |
| PWAR6          | hsa-miR-15a-5p;h C2orf42  |
| MEG3           | hsa-miR-15a-5p;h C2orf42  |
| PKI55          | hsa-miR-15a-5p;h C2orf42  |
| RP11-488L18.10 | hsa-let-7a-5p;hsa ARID3A  |
| PKI55          | hsa-let-7a-5p;hsa ARID3A  |
| RP11-121C2.2   | hsa-let-7a-5p;hsa ARID3A  |
| RP11-78O7.2    | hsa-let-7a-5p;hsa ARID3A  |
| AC009404.2     | hsa-let-7a-5p;hsa ARID3A  |
| RP11-631N16.2  | hsa-miR-106a-5p; EPHA4    |
| LL22NC03-2H8.5 | hsa-let-7a-5p;hsa EPHA4   |
| RNU12          | hsa-miR-150-5p;h BMP8B    |
| RP11-631N16.2  | hsa-miR-106a-5p; BMP8B    |
| LINC00667      | hsa-miR-106b-5p; SSX2IP   |

|                |                           |
|----------------|---------------------------|
| RP11-631N16.2  | hsa-miR-106b-5p;SSX2IP    |
| RNU12          | hsa-miR-548a-5p;EBNA1BP2  |
| RP11-498C9.15  | hsa-miR-339-5p;hEBNA1BP2  |
| RP11-121C2.2   | hsa-miR-548ak;hs;RAB32    |
| RNU12          | hsa-miR-150-5p;hMYB       |
| RNU12          | hsa-miR-324-5p;hCYP20A1   |
| RP11-498C9.15  | hsa-miR-125a-3p;CYP20A1   |
| RP11-631N16.2  | hsa-miR-106b-5p;TRIM32    |
| LINC00667      | hsa-miR-181a-5p;DCAF4     |
| RP11-121C2.2   | hsa-let-7a-5p;hsa;DNAL1   |
| RP11-488L18.10 | hsa-let-7a-5p;hsa;DNAL1   |
| RP11-78O7.2    | hsa-let-7a-5p;hsa;DNAL1   |
| AC009404.2     | hsa-let-7a-5p;hsa;DNAL1   |
| MEG3           | hsa-let-7a-5p;hsa;DNAL1   |
| RP11-1055B8.4  | hsa-miR-212-5p;hIRF2BPL   |
| MEG3           | hsa-miR-150-5p;hEIF2B2    |
| GS1-124K5.11   | hsa-miR-15a-5p;hEIF2B2    |
| LINC00467      | hsa-miR-130a-3p;GPR75     |
| RP11-631N16.2  | hsa-miR-106b-5p;GPAM      |
| LINC00667      | hsa-miR-106b-5p;GPAM      |
| RNU12          | hsa-miR-16-5p;hsGPAM      |
| RP11-701H24.4  | hsa-miR-181a-5p;GOT1      |
| LINC00467      | hsa-miR-130a-3p;HOXB3     |
| RP11-701H24.4  | hsa-miR-3065-5p;HOXB3     |
| MEG3           | hsa-miR-124-3p;hHOXB3     |
| LINC00969      | hsa-miR-15a-5p;hCD274     |
| RNU12          | hsa-miR-15a-5p;hCD274     |
| LINC00667      | hsa-miR-181b-5p;MRPS14    |
| LL22NC03-2H8.5 | hsa-let-7a-5p;hsa;SLC10A7 |
| RP11-631N16.2  | hsa-miR-181a-5p;SLC10A7   |
| LINC00667      | hsa-miR-1275;hsa;SLC10A7  |
| MEG3           | hsa-miR-106a-5p;PLS1      |
| RP11-631N16.2  | hsa-miR-106a-5p;TNFRSF10B |
| LINC00667      | hsa-miR-106b-5p;TNFRSF10B |
| RP11-631N16.2  | hsa-miR-106a-5p;COIL      |
| LL22NC03-2H8.5 | hsa-let-7a-5p;hsa;COIL    |
| RP11-701H24.4  | hsa-miR-106a-5p;LRIF1     |
| MEG3           | hsa-miR-103a-3p;LRIF1     |
| GS1-124K5.11   | hsa-miR-103a-3p;LRIF1     |
| PWAR6          | hsa-miR-15a-5p;hLRIF1     |
| RP11-701H24.4  | hsa-miR-106a-5p;KIAA1191  |
| LINC00467      | hsa-miR-130a-3p;KIAA1191  |
| RP11-631N16.2  | hsa-miR-106a-5p;FAM213A   |
| RNU12          | hsa-miR-150-5p;hFAM213A   |
| LINC00969      | hsa-miR-15a-5p;hTRMT13    |
| MEG3           | hsa-miR-106a-5p;POLM      |
| PWAR6          | hsa-miR-17-5p;hsPOLM      |
| RP11-701H24.4  | hsa-miR-106a-5p;POLM      |
| MEG3           | hsa-miR-100-5p;hEGR2      |
| PWAR6          | hsa-miR-17-5p;hsCIT       |
| MEG3           | hsa-miR-106b-5p;CIT       |
| AC009404.2     | hsa-let-7a-5p;hsa;ACOT9   |
| RP11-78O7.2    | hsa-let-7a-5p;hsa;ACOT9   |
| MEG3           | hsa-let-7a-5p;hsa;ACOT9   |
| PKI55          | hsa-let-7a-5p;hsa;ACOT9   |
| RP11-121C2.2   | hsa-let-7a-5p;hsa;ACOT9   |
| RP11-488L18.10 | hsa-let-7a-5p;hsa;ACOT9   |
| LINC01355      | hsa-miR-144-3p;hNLN       |

|                |                            |
|----------------|----------------------------|
| PKI55          | hsa-miR-19a-3p;h ATPAF1    |
| PVT1           | hsa-miR-27a-3p;h METTL8    |
| PWAR6          | hsa-miR-17-5p;hs PFKFB2    |
| MEG3           | hsa-miR-106a-5p; PFKFB2    |
| RP11-701H24.4  | hsa-miR-106a-5p; PFKFB2    |
| RP11-631N16.2  | hsa-miR-224-5p;h NCOA3     |
| LINC00630      | hsa-miR-25-3p;hs PARD6B    |
| CTD-2587M2.1   | hsa-miR-25-3p;hs PARD6B    |
| RP11-631N16.2  | hsa-miR-106a-5p; BCAS4     |
| RNU12          | hsa-miR-150-5p;h BCAS4     |
| RP11-701H24.4  | hsa-miR-106a-5p; HIST1H2BJ |
| MEG3           | hsa-miR-106a-5p; HIST1H2BJ |
| RP11-138A9.1   | hsa-miR-129-2-3; SOX4      |
| RP11-631N16.2  | hsa-miR-106a-5p; EREG      |
| RP11-37B2.1    | hsa-let-7a-5p;hsa GGA3     |
| GS1-124K5.11   | hsa-miR-30c-1-3; C3        |
| RNU12          | hsa-miR-15a-5p;h TBC1D20   |
| LINC00969      | hsa-miR-15a-5p;h TBC1D20   |
| MEG3           | hsa-miR-103a-3p; AMOT      |
| GS1-124K5.11   | hsa-miR-103a-3p; AMOT      |
| PKI55          | hsa-let-7a-5p;hsa COX6B1   |
| RP11-121C2.2   | hsa-let-7a-5p;hsa COX6B1   |
| RP11-78O7.2    | hsa-let-7a-5p;hsa COX6B1   |
| MEG3           | hsa-let-7a-5p;hsa COX6B1   |
| RP11-488L18.10 | hsa-let-7a-5p;hsa COX6B1   |
| RP11-701H24.4  | hsa-miR-106a-5p; COX6B1    |
| AC009404.2     | hsa-let-7a-5p;hsa COX6B1   |
| LINC00467      | hsa-miR-130a-3p; THRA      |
| LINC01355      | hsa-miR-15a-5p;h IPPK      |
| PWAR6          | hsa-miR-125a-5p; IPPK      |
| GS1-124K5.11   | hsa-miR-15a-5p;h IPPK      |
| PKI55          | hsa-miR-125a-5p; IPPK      |
| RP11-631N16.2  | hsa-miR-106a-5p; RAB3IP    |
| RP11-701H24.4  | hsa-miR-106a-5p; F2RL3     |
| RP11-631N16.2  | hsa-miR-106a-5p; HIP1      |
| MIRLET7BHG     | hsa-miR-24-3p;hs RBM48     |
| LINC00667      | hsa-miR-181a-5p; ZNF780B   |
| RP11-631N16.2  | hsa-miR-1305;hsa KLHDC10   |
| RP11-498C9.15  | hsa-miR-186-5p;h HAT1      |
| LINC00969      | hsa-miR-15a-5p;h ANAPC13   |
| RP11-631N16.2  | hsa-miR-224-5p;h MPDU1     |
| RP11-488L18.10 | hsa-let-7d-5p;hsa MTUS1    |
| MEG3           | hsa-let-7d-5p;hsa MTUS1    |
| RP11-78O7.2    | hsa-let-7d-5p;hsa MTUS1    |
| AC009404.2     | hsa-let-7d-5p;hsa MTUS1    |
| RP11-121C2.2   | hsa-let-7e-5p;hsa MTUS1    |
| PKI55          | hsa-let-7f-5p;hsa MTUS1    |
| RP11-701H24.4  | hsa-miR-125a-5p; MTUS1     |
| LINC00467      | hsa-miR-130a-3p; SIGLEC9   |
| LINC00106      | hsa-miR-129-2-3; BCL2L2    |
| RP11-1055B8.4  | hsa-miR-30b-3p;h DTD2      |
| RP11-631N16.2  | hsa-miR-106a-5p; EGLN3     |
| RP11-631N16.2  | hsa-miR-382-5p;h DAD1      |
| RP11-458F8.4   | hsa-let-7a-5p;hsa THEM6    |
| MIRLET7BHG     | hsa-miR-221-5p;h TOMM40    |
| SNHG8          | hsa-miR-125a-5p; LSM4      |
| LINC00467      | hsa-miR-130a-3p; MED18     |
| RP11-701H24.4  | hsa-miR-106a-5p; MED18     |

|                |                           |
|----------------|---------------------------|
| RP11-701H24.4  | hsa-miR-106a-5p; C12orf65 |
| MEG3           | hsa-miR-106a-5p; C12orf65 |
| LINC01355      | hsa-miR-30a-5p;h HABP4    |
| RP11-332H14.2  | hsa-miR-30a-5p;h HABP4    |
| MEG3           | hsa-miR-30a-5p;h HABP4    |
| LINC00969      | hsa-miR-200b-3p; ATP6V1E1 |
| RP11-701H24.4  | hsa-miR-106a-5p; HAUS8    |
| MEG3           | hsa-miR-106a-5p; HAUS8    |
| RP11-498C9.15  | hsa-miR-26a-5p;h KIF3A    |
| RNU12          | hsa-miR-150-5p;h KIF3A    |
| LINC00667      | hsa-miR-19a-3p;h KIF3A    |
| LINC00969      | hsa-miR-130a-3p; PRKAA1   |
| RNU12          | hsa-miR-15a-5p;h PRKAA1   |
| RP11-631N16.2  | hsa-miR-1305;hsa PRKAA1   |
| LINC00467      | hsa-miR-130a-3p; NIP7     |
| RP11-121C2.2   | hsa-miR-548ak;hs; ANKEF1  |
| PWAR6          | hsa-miR-17-5p;hs RFXAP    |
| RP11-701H24.4  | hsa-miR-106a-5p; RFXAP    |
| MEG3           | hsa-miR-106a-5p; RFXAP    |
| LINC00467      | hsa-miR-130a-3p; RFXAP    |
| LL22NC03-2H8.5 | hsa-let-7a-5p;hsa FAM104A |
| LINC00667      | hsa-miR-148b-3p; FAM104A  |
| RP11-631N16.2  | hsa-miR-30a-5p;h FAM104A  |
| MIRLET7BHG     | hsa-miR-24-3p;hs C1QTNF6  |
| LINC01355      | hsa-miR-15a-5p;h ACTR3B   |
| PKI55          | hsa-miR-15a-5p;h ACTR3B   |
| GS1-124K5.11   | hsa-miR-15a-5p;h ACTR3B   |
| PWAR6          | hsa-miR-15a-5p;h ACTR3B   |
| MEG3           | hsa-miR-127-3p;h ACTR3B   |
| LINC00467      | hsa-miR-130a-3p; TMTC1    |
| RP11-631N16.2  | hsa-miR-106a-5p; RRAS2    |
| MEG3           | hsa-miR-204-5p;h RNF122   |
| RP11-332H14.2  | hsa-miR-30a-5p;h RNF122   |
| LINC01355      | hsa-miR-30a-5p;h RNF122   |
| LINC00969      | hsa-miR-15a-5p;h CD180    |
| RP11-631N16.2  | hsa-miR-30b-5p;h NAPG     |
| GS1-124K5.11   | hsa-miR-15a-5p;h RFK      |
| PWAR6          | hsa-miR-15a-5p;h RFK      |
| RP11-701H24.4  | hsa-miR-106a-5p; RFK      |
| MEG3           | hsa-miR-106a-5p; RFK      |
| LINC00969      | hsa-miR-27a-3p;h CEP162   |
| RP11-631N16.2  | hsa-miR-106a-5p; PRRG4    |
| LINC00630      | hsa-miR-25-3p;hs TSPAN31  |
| CTD-2587M2.1   | hsa-miR-25-3p;hs TSPAN31  |
| RP11-631N16.2  | hsa-miR-106a-5p; KLHL36   |
| RNU12          | hsa-miR-1185-5p; KLHL36   |
| PWAR6          | hsa-miR-124-3p;h LAMC1    |
| MEG3           | hsa-miR-106b-5p; LAMC1    |
| LINC01355      | hsa-miR-15a-5p;h LAMC1    |
| PKI55          | hsa-miR-124-3p;h LAMC1    |
| GS1-124K5.11   | hsa-miR-15a-5p;h LAMC1    |
| RP11-488L18.10 | hsa-let-7a-5p;hsa IGF2BP3 |
| RP11-121C2.2   | hsa-let-7a-5p;hsa IGF2BP3 |
| AC009404.2     | hsa-let-7a-5p;hsa IGF2BP3 |
| PKI55          | hsa-let-7a-5p;hsa IGF2BP3 |
| RP11-78O7.2    | hsa-let-7a-5p;hsa IGF2BP3 |
| LINC00667      | hsa-miR-107;hsa- SRSF1    |
| LINC00969      | hsa-miR-15a-5p;h SRSF1    |

|                |                            |
|----------------|----------------------------|
| LL22NC03-2H8.5 | hsa-let-7a-5p;hsa LIMD2    |
| MEG3           | hsa-miR-30a-3p;h RTP4      |
| LINC00969      | hsa-miR-15a-5p;h VPS45     |
| LINC00467      | hsa-miR-130a-3p; PRPF4     |
| LINC00667      | hsa-miR-106b-5p; GOLGA1    |
| RP11-631N16.2  | hsa-miR-106b-5p; GOLGA1    |
| RP11-498C9.15  | hsa-miR-125a-5p; GOLGA1    |
| RP11-352M15.2  | hsa-miR-145-5p;h MYC       |
| MEG3           | hsa-miR-129-1-3; DNAJB5    |
| LINC00667      | hsa-miR-200c-3p; TJAP1     |
| GS1-124K5.11   | hsa-miR-15a-5p;h TUBB2A    |
| PKI55          | hsa-let-7a-5p;hsa TUBB2A   |
| MEG3           | hsa-let-7a-5p;hsa TUBB2A   |
| AC009404.2     | hsa-let-7a-5p;hsa TUBB2A   |
| RP11-78O7.2    | hsa-let-7a-5p;hsa TUBB2A   |
| RP11-79H23.3   | hsa-miR-181a-5p; TUBB2A    |
| RP11-488L18.10 | hsa-let-7a-5p;hsa TUBB2A   |
| MEG3           | hsa-miR-106a-5p; ATAT1     |
| RP11-701H24.4  | hsa-miR-106a-5p; ATAT1     |
| LL22NC03-2H8.5 | hsa-let-7a-5p;hsa RNF144B  |
| RP11-498C9.15  | hsa-miR-199a-3p; CREBZF    |
| RP11-37B2.1    | hsa-let-7a-5p;hsa RDX      |
| PKI55          | hsa-let-7a-5p;hsa SLC5A6   |
| RP11-121C2.2   | hsa-let-7a-5p;hsa SLC5A6   |
| RP11-488L18.10 | hsa-let-7a-5p;hsa SLC5A6   |
| AC009404.2     | hsa-let-7a-5p;hsa SLC5A6   |
| RP11-78O7.2    | hsa-let-7a-5p;hsa SLC5A6   |
| RP11-79H23.3   | hsa-miR-181a-5p; CENPO     |
| RNU12          | hsa-miR-130a-5p; STAMBPL1  |
| RP11-488L18.10 | hsa-let-7a-5p;hsa DNA2     |
| RP11-78O7.2    | hsa-let-7a-5p;hsa DNA2     |
| RP11-121C2.2   | hsa-let-7a-5p;hsa DNA2     |
| MEG3           | hsa-let-7a-5p;hsa DNA2     |
| PKI55          | hsa-let-7a-5p;hsa DNA2     |
| AC009404.2     | hsa-let-7a-5p;hsa DNA2     |
| LL22NC03-2H8.5 | hsa-let-7a-5p;hsa PARP16   |
| MEG3           | hsa-miR-106a-5p; SEMA7A    |
| PWAR6          | hsa-miR-126-5p;h SEMA7A    |
| RP11-701H24.4  | hsa-miR-106a-5p; SEMA7A    |
| LINC00667      | hsa-miR-181a-5p; FAM13A    |
| RP11-631N16.2  | hsa-miR-181a-5p; FAM13A    |
| RP11-121C2.2   | hsa-miR-548ak;hs; PRKG2    |
| MEG3           | hsa-miR-136-5p;h ZCRB1     |
| LINC01355      | hsa-miR-30a-5p;h ZCRB1     |
| RP11-332H14.2  | hsa-miR-30a-5p;h ZCRB1     |
| RP11-37B2.1    | hsa-let-7a-5p;hsa C1RL     |
| RP11-631N16.2  | hsa-miR-30a-5p;h LMBR1L    |
| LINC00969      | hsa-miR-129-5p;h HNRNPA1L2 |
| RP11-631N16.2  | hsa-miR-30a-5p;h VPS33A    |
| RP11-498C9.15  | hsa-miR-199a-3p; VPS33A    |
| GS1-124K5.11   | hsa-miR-15a-5p;h RAB15     |
| RP11-631N16.2  | hsa-miR-106b-5p; WDR89     |
| RP11-631N16.2  | hsa-miR-30a-5p;h BAHD1     |
| RNU12          | hsa-miR-1185-5p; TPM1      |
| RP11-1055B8.4  | hsa-miR-103a-3p; C16orf58  |
| MEG3           | hsa-miR-103a-3p; C16orf58  |
| PWAR6          | hsa-miR-15a-5p;h C16orf58  |
| RP11-332H14.2  | hsa-miR-1224-3p; C16orf58  |

|                |                           |
|----------------|---------------------------|
| GS1-124K5.11   | hsa-miR-103a-3p; C16orf58 |
| RP11-631N16.2  | hsa-miR-30a-5p;h TAF4B    |
| GS1-124K5.11   | hsa-miR-15a-5p;h GNAL     |
| MEG3           | hsa-miR-15a-5p;h GNAL     |
| PKI55          | hsa-miR-15a-5p;h GNAL     |
| GS1-124K5.11   | hsa-miR-15a-5p;h RAB40B   |
| PWAR6          | hsa-miR-15a-5p;h RAB40B   |
| PKI55          | hsa-miR-15a-5p;h RAB40B   |
| LINC01355      | hsa-miR-15a-5p;h RAB40B   |
| LL22NC03-2H8.5 | hsa-let-7a-5p;hsa EIF4A3  |
| CTD-2587M2.1   | hsa-miR-25-3p;hs NARF     |
| LINC00630      | hsa-miR-25-3p;hs NARF     |
| RP11-701H24.4  | hsa-miR-106a-5p; TRIM65   |
| RP11-332H14.2  | hsa-miR-30b-5p;h SH3GL1   |
| MEG3           | hsa-miR-122-5p;h SH3GL1   |
| LINC01355      | hsa-miR-30b-5p;h SH3GL1   |
| RP11-701H24.4  | hsa-miR-106a-5p; DPP9     |
| LINC00667      | hsa-miR-125a-5p; AKT1     |
| RP11-498C9.15  | hsa-miR-125a-5p; AKT1     |
| LINC00969      | hsa-miR-15b-5p;h CARM1    |
| RNU12          | hsa-miR-15b-5p;h CARM1    |
| LINC00467      | hsa-miR-130a-3p; GPR161   |
| LINC00667      | hsa-miR-106b-5p; ALDH9A1  |
| RP11-631N16.2  | hsa-miR-106b-5p; ALDH9A1  |
| SNHG8          | hsa-miR-186-3p;h PIGM     |
| RP11-458F8.4   | hsa-let-7a-5p;hsa INTS7   |
| RP11-701H24.4  | hsa-miR-106a-5p; SNAP47   |
| RP11-631N16.2  | hsa-miR-106a-5p; DEGS1    |
| RNU12          | hsa-miR-150-5p;h DEGS1    |
| AC004951.6     | hsa-miR-30a-3p;h SYT2     |
| LINC00667      | hsa-miR-548ak;hs MRPS5    |
| RP11-498C9.15  | hsa-miR-548am-5 MRPS5     |
| RNU12          | hsa-miR-548a-5p; MRPS5    |
| RP11-488L18.10 | hsa-let-7a-5p;hsa RABL2A  |
| PKI55          | hsa-let-7a-5p;hsa RABL2A  |
| AC009404.2     | hsa-let-7a-5p;hsa RABL2A  |
| RP11-121C2.2   | hsa-let-7a-5p;hsa RABL2A  |
| MEG3           | hsa-let-7a-5p;hsa RABL2A  |
| RP11-78O7.2    | hsa-let-7a-5p;hsa RABL2A  |
| LINC00969      | hsa-miR-145-5p;h VGLL4    |
| LINC00969      | hsa-miR-15a-5p;h SRPRB    |
| RNU12          | hsa-miR-15a-5p;h SRPRB    |
| MIRLET7BHG     | hsa-miR-24-3p;hs SCD5     |
| RP11-631N16.2  | hsa-miR-519a-3p; KLHL8    |
| LINC00467      | hsa-miR-130a-3p; CCNA2    |
| MIRLET7BHG     | hsa-miR-24-3p;hs CCNA2    |
| SNHG8          | hsa-miR-19a-3p;h CCNA2    |
| PKI55          | hsa-let-7b-5p;hsa CCNA2   |
| RP11-631N16.2  | hsa-miR-224-5p;h LHFPL2   |
| RP11-498C9.15  | hsa-miR-137;hsa LHFPL2    |
| RNU12          | hsa-miR-150-5p;h GTF2H2   |
| RP11-631N16.2  | hsa-miR-106a-5p; GTF2H2   |
| RP11-631N16.2  | hsa-miR-106a-5p; KCNMB1   |
| RP11-701H24.4  | hsa-miR-106a-5p; TNFRSF21 |
| MEG3           | hsa-miR-106a-5p; TNFRSF21 |
| PWAR6          | hsa-miR-124-3p;h TNFRSF21 |
| LL22NC03-2H8.5 | hsa-let-7a-5p;hsa PRIM2   |
| RP11-498C9.15  | hsa-miR-144-3p;h RPL7L1   |

|                |                             |
|----------------|-----------------------------|
| RNU12          | hsa-miR-130a-5p; RPL7L1     |
| LL22NC03-2H8.5 | hsa-let-7a-5p; hsa PM20D2   |
| LL22NC03-2H8.5 | hsa-let-7a-5p; hsa NOM1     |
| LINC00969      | hsa-miR-15a-5p; h CASK      |
| RP11-79H23.3   | hsa-miR-181a-5p; KRBOX4     |
| LINC00969      | hsa-miR-15a-5p; h PROSC     |
| RNU12          | hsa-miR-150-5p; h PROSC     |
| RP11-701H24.4  | hsa-miR-106a-5p; LRP12      |
| PWAR6          | hsa-miR-15a-5p; h NR6A1     |
| MEG3           | hsa-let-7a-5p; hsa NR6A1    |
| AC009404.2     | hsa-let-7a-5p; hsa NR6A1    |
| RP11-121C2.2   | hsa-let-7a-5p; hsa NR6A1    |
| GS1-124K5.11   | hsa-miR-15a-5p; h NR6A1     |
| RP11-78O7.2    | hsa-let-7a-5p; hsa NR6A1    |
| RP11-488L18.10 | hsa-let-7a-5p; hsa NR6A1    |
| PKI55          | hsa-let-7a-5p; hsa NR6A1    |
| MIRLET7BHG     | hsa-miR-1226-3p; SURF2      |
| RP11-79H23.3   | hsa-miR-181a-5p; MIGA2      |
| RP11-701H24.4  | hsa-miR-181a-5p; MIGA2      |
| MEG3           | hsa-miR-149-3p; h MIGA2     |
| RP11-121C2.2   | hsa-miR-106a-5p; NACC2      |
| LINC00467      | hsa-miR-130a-3p; NACC2      |
| RP11-701H24.4  | hsa-miR-106a-5p; PARD3      |
| RP11-631N16.2  | hsa-miR-106a-5p; POLR3A     |
| RP11-121C2.2   | hsa-miR-218-5p; h MKI67     |
| PWAR6          | hsa-miR-218-5p; h ADAM12    |
| RP11-1055B8.4  | hsa-miR-103a-3p; LIN7C      |
| PWAR6          | hsa-miR-1-3p; hsa LIN7C     |
| RP11-332H14.2  | hsa-miR-30a-5p; h LIN7C     |
| MEG3           | hsa-miR-103a-3p; LIN7C      |
| LINC01355      | hsa-miR-30a-5p; h LIN7C     |
| LINC00969      | hsa-miR-15a-5p; h SSRP1     |
| RNU12          | hsa-miR-15a-5p; h SSRP1     |
| RP11-1055B8.4  | hsa-miR-149-5p; h SERPINH1  |
| CTD-2587M2.1   | hsa-miR-25-3p; hs INCENP    |
| LINC00630      | hsa-miR-25-3p; hs INCENP    |
| RP11-1055B8.4  | hsa-miR-34b-5p; h HIRIP3    |
| CTD-2587M2.1   | hsa-miR-25-3p; hs TIRAP     |
| LINC00630      | hsa-miR-25-3p; hs TIRAP     |
| LL22NC03-2H8.5 | hsa-let-7a-5p; hsa KIAA1328 |
| LINC00667      | hsa-miR-19a-3p; h MTMR12    |
| LINC00667      | hsa-miR-143-3p; h GXYLT1    |
| RP11-631N16.2  | hsa-miR-30a-5p; h GXYLT1    |
| RP11-352M15.2  | hsa-miR-30b-5p; h GXYLT1    |
| LL22NC03-2H8.5 | hsa-let-7a-5p; hsa THYN1    |
| RP11-631N16.2  | hsa-miR-106a-5p; FAM160B1   |
| RP11-631N16.2  | hsa-miR-106b-5p; TMEM267    |
| LINC00969      | hsa-miR-141-5p; h RNF219    |
| LINC00667      | hsa-miR-181a-5p; SUV39H2    |
| LINC00630      | hsa-miR-25-3p; hs GTF2E1    |
| CTD-2587M2.1   | hsa-miR-137; hsa GTF2E1     |
| RP11-631N16.2  | hsa-miR-30a-5p; h CFDP1     |
| RP11-498C9.15  | hsa-miR-27a-3p; h CFDP1     |
| LINC00630      | hsa-miR-25-3p; hs MCOLN2    |
| LINC00667      | hsa-miR-143-3p; h PPP2R5E   |
| RP11-631N16.2  | hsa-miR-4317; hsa CCSAP     |
| PWAR6          | hsa-miR-132-3p; h TCEB1     |
| RP11-701H24.4  | hsa-miR-106a-5p; TCEB1      |

|                |                            |
|----------------|----------------------------|
| RP11-631N16.2  | hsa-miR-106a-5p; BTG3      |
| RP11-631N16.2  | hsa-miR-106a-5p; MPPE1     |
| GS1-124K5.11   | hsa-miR-15a-5p;h FBXL18    |
| PKI55          | hsa-miR-125a-5p; FBXL18    |
| PWAR6          | hsa-miR-125a-5p; FBXL18    |
| RP11-701H24.4  | hsa-miR-106a-5p; RHOC      |
| MIRLET7BHG     | hsa-miR-29a-3p;h TMEM237   |
| LINC01355      | hsa-miR-193b-5p; SLC26A2   |
| RP11-631N16.2  | hsa-miR-106a-5p; DUSP2     |
| LINC00630      | hsa-miR-25-3p;hs CNNM4     |
| CTD-2587M2.1   | hsa-miR-25-3p;hs CNNM4     |
| LL22NC03-2H8.5 | hsa-let-7a-5p;hsa AHCYL2   |
| RP11-631N16.2  | hsa-miR-185-5p;h B4GALT5   |
| LL22NC03-2H8.5 | hsa-let-7a-5p;hsa TMED4    |
| LL22NC03-2H8.5 | hsa-let-7a-5p;hsa GPAT4    |
| LINC00630      | hsa-miR-25-3p;hs ZSCAN12   |
| LL22NC03-2H8.5 | hsa-let-7a-5p;hsa TOMM40L  |
| RP11-631N16.2  | hsa-miR-106a-5p; THEM4     |
| RNU12          | hsa-miR-15a-5p;h TMEM69    |
| LINC00969      | hsa-miR-15a-5p;h TMEM69    |
| RP11-37B2.1    | hsa-let-7a-5p;hsa ICOSLG   |
| RP11-488L18.10 | hsa-let-7a-5p;hsa C19orf47 |
| AC009404.2     | hsa-let-7a-5p;hsa C19orf47 |
| MIRLET7BHG     | hsa-miR-30c-1-3p; C19orf47 |
| PKI55          | hsa-let-7a-5p;hsa C19orf47 |
| RP11-121C2.2   | hsa-let-7a-5p;hsa C19orf47 |
| RP11-78O7.2    | hsa-let-7a-5p;hsa C19orf47 |
| PKI55          | hsa-miR-125a-5p; TOR2A     |
| LINC01355      | hsa-miR-193b-5p; TOR2A     |
| RNU12          | hsa-miR-1226-5p; SLC25A44  |
| LINC00630      | hsa-miR-25-3p;hs ORAI2     |
| CTD-2587M2.1   | hsa-miR-25-3p;hs ORAI2     |
| RNU12          | hsa-miR-150-5p;h PCYT1A    |
| RP11-631N16.2  | hsa-miR-106a-5p; ZNF385A   |
| RP11-701H24.4  | hsa-miR-106a-5p; ASB16     |
| GS1-124K5.11   | hsa-miR-103a-3p; RACGAP1   |
| LINC00467      | hsa-miR-130a-3p; RACGAP1   |
| RP11-701H24.4  | hsa-miR-106a-5p; RACGAP1   |
| MEG3           | hsa-miR-103a-3p; RACGAP1   |
| PWAR6          | hsa-miR-15a-5p;h RACGAP1   |
| GS1-124K5.11   | hsa-miR-15a-5p;h ASGR2     |
| LINC01355      | hsa-miR-15a-5p;h ASGR2     |
| CTD-2587M2.1   | hsa-miR-137;hsa-  ASGR2    |
| PKI55          | hsa-miR-137;hsa-  ASGR2    |
| PWAR6          | hsa-miR-15a-5p;h ASGR2     |
| LINC00630      | hsa-miR-25-3p;hs ASGR2     |
| MEG3           | hsa-miR-137;hsa-  ASGR2    |
| MIRLET7BHG     | hsa-miR-2355-5p; CCNF      |
| MIRLET7BHG     | hsa-miR-3065-3p; CLPB      |
| LINC00910      | hsa-let-7a-5p;hsa AK4      |
| LINC00969      | hsa-miR-130a-3p; IL23R     |
| RNU12          | hsa-miR-1226-5p; OMA1      |
| LINC00969      | hsa-miR-130a-3p; ACP6      |
| MIRLET7BHG     | hsa-miR-24-3p;hs RFTN2     |
| RP11-631N16.2  | hsa-miR-106b-5p; NUP35     |
| LINC00969      | hsa-miR-130a-3p; EOGT      |
| LINC00667      | hsa-miR-148b-3p; EOGT      |
| RP11-1055B8.4  | hsa-miR-1254;hsa CHCHD4    |



|                |                           |
|----------------|---------------------------|
| PVT1           | hsa-miR-27a-3p;h EIF5A2   |
| LINC00467      | hsa-miR-130a-3p; C4orf36  |
| RP11-121C2.2   | hsa-miR-548ak;hs; TPRA1   |
| LINC00630      | hsa-miR-25-3p;hs TMEM41A  |
| CTD-2587M2.1   | hsa-miR-137;hsa- TMEM41A  |
| LINC00467      | hsa-miR-130a-3p; RFT1     |
| LINC00969      | hsa-miR-129-5p;h SLBP     |
| RP11-631N16.2  | hsa-miR-106a-5p; LRPAP1   |
| RNU12          | hsa-miR-17-5p;hs LRPAP1   |
| RP11-701H24.4  | hsa-miR-106a-5p; EXO5     |
| RP11-701H24.4  | hsa-miR-106a-5p; C1orf50  |
| RP11-631N16.2  | hsa-miR-106a-5p; ITGA2    |
| LINC00467      | hsa-miR-130a-3p; MOCS2    |
| RP11-701H24.4  | hsa-miR-519a-3p; MOCS2    |
| RP11-631N16.2  | hsa-miR-106a-5p; SLC25A46 |
| RP11-631N16.2  | hsa-miR-224-5p;h CASP3    |
| SNHG8          | hsa-miR-197-3p;h MB21D1   |
| LINC00969      | hsa-miR-1-3p;hsa SFXN1    |
| MEG3           | hsa-miR-15a-5p;h KIAA0895 |
| GS1-124K5.11   | hsa-miR-15a-5p;h KIAA0895 |
| PKI55          | hsa-miR-15a-5p;h KIAA0895 |
| PWAR6          | hsa-miR-15a-5p;h KIAA0895 |
| LINC01355      | hsa-miR-15a-5p;h KIAA0895 |
| LINC01355      | hsa-miR-30a-5p;h BMT2     |
| PWAR6          | hsa-miR-17-5p;hs BMT2     |
| MEG3           | hsa-miR-106b-5p; BMT2     |
| RP11-332H14.2  | hsa-miR-30a-5p;h BMT2     |
| RP11-701H24.4  | hsa-miR-17-5p;hs BMT2     |
| MIRLET7BHG     | hsa-miR-34a-5p;h SLC4A2   |
| MEG3           | hsa-miR-146b-3p; COX6C    |
| RP11-701H24.4  | hsa-miR-519a-3p; COX6C    |
| MEG3           | hsa-miR-125b-5p; FZD6     |
| PKI55          | hsa-miR-125b-5p; FZD6     |
| PWAR6          | hsa-miR-125b-5p; FZD6     |
| RP11-1055B8.4  | hsa-miR-125b-5p; FZD6     |
| RP11-701H24.4  | hsa-miR-16-1-3p; TMEM67   |
| LINC00630      | hsa-miR-25-3p;hs CCDC171  |
| CTD-2587M2.1   | hsa-miR-25-3p;hs CCDC171  |
| RP11-121C2.2   | hsa-let-7a-5p;hsa FXN     |
| PKI55          | hsa-let-7a-5p;hsa FXN     |
| MEG3           | hsa-let-7a-5p;hsa FXN     |
| AC009404.2     | hsa-let-7a-5p;hsa FXN     |
| RP11-488L18.10 | hsa-let-7a-5p;hsa FXN     |
| RP11-78O7.2    | hsa-let-7a-5p;hsa FXN     |
| RP11-37B2.1    | hsa-let-7a-5p;hsa KIF27   |
| PWAR6          | hsa-miR-139-5p;h ZNF367   |
| LINC01355      | hsa-miR-15a-5p;h ZNF367   |
| GS1-124K5.11   | hsa-miR-15a-5p;h ZNF367   |
| MEG3           | hsa-miR-15a-5p;h ZNF367   |
| PKI55          | hsa-miR-15a-5p;h ZNF367   |
| RP11-631N16.2  | hsa-miR-1277-5p; AQP3     |
| RNU12          | hsa-miR-548a-5p; AQP3     |
| RP11-498C9.15  | hsa-miR-548am-5 AQP3      |
| RP11-631N16.2  | hsa-miR-106b-5p; PIGO     |
| AC009404.2     | hsa-let-7a-5p;hsa PGM2L1  |
| MEG3           | hsa-let-7a-5p;hsa PGM2L1  |
| RP11-488L18.10 | hsa-let-7a-5p;hsa PGM2L1  |
| RP11-78O7.2    | hsa-let-7a-5p;hsa PGM2L1  |

|                |                          |
|----------------|--------------------------|
| RP11-121C2.2   | hsa-let-7a-5p;hsa PGM2L1 |
| PKI55          | hsa-let-7a-5p;hsa PGM2L1 |
| MEG3           | hsa-miR-106a-5p; REEP3   |
| MIRLET7BHG     | hsa-miR-139-3p;h REEP3   |
| RP11-701H24.4  | hsa-miR-106a-5p; REEP3   |
| RP11-332H14.2  | hsa-miR-30a-5p;h KBTBD6  |
| RP11-701H24.4  | hsa-miR-519a-3p; KBTBD6  |
| LINC01355      | hsa-miR-30a-5p;h KBTBD6  |
| LINC00467      | hsa-miR-130a-3p; KBTBD6  |
| RP11-121C2.2   | hsa-miR-548ak;hs: VDAC2  |
| LL22NC03-2H8.5 | hsa-let-7a-5p;hsa PMPCA  |
| RP11-121C2.2   | hsa-miR-548ak;hs: HPRT1  |
| PKI55          | hsa-miR-15a-5p;h E2F7    |
| MEG3           | hsa-miR-15a-5p;h E2F7    |
| LINC01355      | hsa-miR-15a-5p;h E2F7    |
| GS1-124K5.11   | hsa-miR-15a-5p;h E2F7    |
| RNU12          | hsa-miR-1304-3p; ISCA2   |
| RP11-631N16.2  | hsa-miR-106a-5p; ISCA2   |
| PKI55          | hsa-let-7a-5p;hsa POLL   |
| RP11-121C2.2   | hsa-let-7a-5p;hsa POLL   |
| RP11-488L18.10 | hsa-let-7a-5p;hsa POLL   |
| AC009404.2     | hsa-let-7a-5p;hsa POLL   |
| RP11-78O7.2    | hsa-let-7a-5p;hsa POLL   |
| MEG3           | hsa-miR-106a-5p; ZNF202  |
| RP11-701H24.4  | hsa-miR-106a-5p; ZNF202  |
| RP11-701H24.4  | hsa-miR-106a-5p; CYB5A   |
| MEG3           | hsa-miR-106a-5p; CYB5A   |
| RNU12          | hsa-miR-548a-5p; TMEM41B |
| RP11-498C9.15  | hsa-miR-548am-5 TMEM41B  |
| RP11-1055B8.4  | hsa-miR-103a-3p; MCM7    |
| GS1-124K5.11   | hsa-miR-103a-3p; MCM7    |
| MEG3           | hsa-miR-103a-3p; MCM7    |
| RP11-701H24.4  | hsa-miR-519a-3p; MCM7    |
| PWAR6          | hsa-miR-15a-5p;h TMEM135 |
| LINC01355      | hsa-miR-15a-5p;h TMEM135 |
| MEG3           | hsa-miR-15a-5p;h TMEM135 |
| PKI55          | hsa-miR-15a-5p;h TMEM135 |
| GS1-124K5.11   | hsa-miR-15a-5p;h TMEM135 |
| RP11-631N16.2  | hsa-miR-10a-3p;h BLCAP   |
| MEG3           | hsa-miR-106b-5p; AKTIP   |
| LINC00467      | hsa-miR-130a-3p; DUSP18  |
| LINC00630      | hsa-miR-25-3p;hs SNRPD1  |
| CTD-2587M2.1   | hsa-miR-25-3p;hs SNRPD1  |
| CTD-2587M2.1   | hsa-miR-137;hsa- DUS2    |
| LINC00630      | hsa-miR-25-3p;hs DUS2    |
| LL22NC03-2H8.5 | hsa-let-7a-5p;hsa RRM1   |
| LINC00667      | hsa-miR-181a-5p; ZNF23   |
| RP11-701H24.4  | hsa-miR-106a-5p; ZNF180  |
| MEG3           | hsa-miR-106a-5p; ZNF180  |
| LINC00630      | hsa-miR-27a-3p;h SERTAD3 |
| RNU12          | hsa-miR-17-5p;hs TSR1    |
| RP11-631N16.2  | hsa-miR-106a-5p; TSR1    |
| RNU12          | hsa-miR-15a-5p;h OTUB1   |
| LINC00467      | hsa-miR-130a-3p; CDK2AP2 |
| LINC00969      | hsa-miR-16-2-3p; TMEM68  |
| MEG3           | hsa-miR-106b-5p; ZNF597  |
| RP11-701H24.4  | hsa-miR-17-5p;hs ZNF597  |
| LINC00969      | hsa-miR-15a-5p;h MAP4K2  |

|                |                           |
|----------------|---------------------------|
| RP11-631N16.2  | hsa-miR-106a-5p; PDHB     |
| RNU12          | hsa-miR-150-5p;h PDHB     |
| MEG3           | hsa-miR-106a-5p; MFSD2A   |
| SNHG8          | hsa-miR-125a-3p; MFSD2A   |
| RP11-701H24.4  | hsa-miR-106a-5p; MFSD2A   |
| RP11-1055B8.4  | hsa-miR-30b-3p;h NDUFS5   |
| RP11-1055B8.4  | hsa-miR-188-5p;h SLC16A4  |
| GS1-124K5.11   | hsa-miR-30c-1-3p; SLC16A4 |
| AC009404.2     | hsa-let-7a-5p;hsa SEMA4C  |
| RP11-488L18.10 | hsa-let-7a-5p;hsa SEMA4C  |
| MEG3           | hsa-let-7a-5p;hsa SEMA4C  |
| RP11-78O7.2    | hsa-let-7a-5p;hsa SEMA4C  |
| PKI55          | hsa-let-7a-5p;hsa SEMA4C  |
| RP11-121C2.2   | hsa-let-7a-5p;hsa SEMA4C  |
| RP11-1055B8.4  | hsa-miR-2278;hsa TCTN2    |
| RP11-701H24.4  | hsa-miR-106a-5p; ABHD15   |
| MEG3           | hsa-miR-106a-5p; ABHD15   |
| RP11-121C2.2   | hsa-miR-548ak;hs; TNIP2   |
| RP11-458F8.4   | hsa-let-7a-5p;hsa E2F6    |
| RP11-79H23.3   | hsa-miR-30c-1-3p; AR      |
| MIRLET7BHG     | hsa-miR-2110;hsa AR       |
| LINC00667      | hsa-miR-548ak;hs; PRELID1 |
| RP11-498C9.15  | hsa-miR-548am-5 PRELID1   |
| RNU12          | hsa-miR-548a-5p; PRELID1  |
| LINC01355      | hsa-miR-26a-5p;h SMAD1    |
| RP11-332H14.2  | hsa-miR-26a-5p;h SMAD1    |
| MEG3           | hsa-miR-186-5p;h SMAD1    |
| RP11-488L18.10 | hsa-miR-26a-5p;h SMAD1    |
| MEG3           | hsa-miR-106a-5p; SLC30A1  |
| PWAR6          | hsa-miR-17-5p;hs SLC30A1  |
| RP11-701H24.4  | hsa-miR-106a-5p; SLC30A1  |
| PKI55          | hsa-miR-21-5p;hs SOCS6    |
| MEG3           | hsa-miR-23a-3p;h SOCS6    |
| LINC00467      | hsa-miR-130a-3p; CDCA4    |
| LINC01355      | hsa-miR-15a-5p;h CDCA4    |
| GS1-124K5.11   | hsa-miR-15a-5p;h CDCA4    |
| RP11-631N16.2  | hsa-miR-1277-5p; MSANTD4  |
| LINC00969      | hsa-miR-130a-3p; MSANTD4  |
| RP11-498C9.15  | hsa-miR-30b-5p;h MSANTD4  |
| RNU12          | hsa-miR-1268a;hs MSANTD4  |
| LINC01355      | hsa-miR-15a-5p;h OSCAR    |
| PWAR6          | hsa-miR-15a-5p;h OSCAR    |
| GS1-124K5.11   | hsa-miR-15a-5p;h OSCAR    |
| PKI55          | hsa-miR-15a-5p;h OSCAR    |
| MEG3           | hsa-miR-136-5p;h PAQR8    |
| LINC00630      | hsa-miR-25-3p;hs C11orf24 |
| PKI55          | hsa-miR-15a-5p;h C11orf24 |
| GS1-124K5.11   | hsa-miR-15a-5p;h C11orf24 |
| MEG3           | hsa-miR-15a-5p;h C11orf24 |
| CTD-2587M2.1   | hsa-miR-25-3p;hs C11orf24 |
| LINC01355      | hsa-miR-15a-5p;h C11orf24 |
| PWAR6          | hsa-miR-15a-5p;h C11orf24 |
| RP11-701H24.4  | hsa-miR-106a-5p; NETO2    |
| PWAR6          | hsa-miR-1-3p;hsa NETO2    |
| MEG3           | hsa-miR-106a-5p; NETO2    |
| RP11-631N16.2  | hsa-miR-106a-5p; WIPF2    |
| RP11-78O7.2    | hsa-let-7a-5p;hsa GATM    |
| RP11-121C2.2   | hsa-let-7a-5p;hsa GATM    |

|                |                            |
|----------------|----------------------------|
| AC009404.2     | hsa-let-7a-5p;hsa GATM     |
| RP11-488L18.10 | hsa-let-7a-5p;hsa GATM     |
| PKI55          | hsa-let-7a-5p;hsa GATM     |
| RP11-701H24.4  | hsa-miR-106a-5p; RNASEH1   |
| RP11-631N16.2  | hsa-miR-106b-5p; ORMDL3    |
| PWAR6          | hsa-miR-17-5p;hs NME6      |
| RP11-701H24.4  | hsa-miR-106a-5p; NME6      |
| MEG3           | hsa-miR-19a-5p;h CXCR6     |
| AC009404.2     | hsa-let-7a-5p;hsa FNDC9    |
| MEG3           | hsa-let-7a-5p;hsa FNDC9    |
| RP11-78O7.2    | hsa-let-7a-5p;hsa FNDC9    |
| PKI55          | hsa-let-7a-5p;hsa FNDC9    |
| RP11-121C2.2   | hsa-let-7a-5p;hsa FNDC9    |
| RP11-488L18.10 | hsa-let-7a-5p;hsa FNDC9    |
| RP11-701H24.4  | hsa-miR-106a-5p; TMEM134   |
| MEG3           | hsa-miR-106a-5p; TMEM134   |
| RP11-701H24.4  | hsa-miR-106a-5p; FUT10     |
| PKI55          | hsa-let-7a-5p;hsa FUT10    |
| MEG3           | hsa-let-7a-5p;hsa FUT10    |
| RP11-121C2.2   | hsa-let-7a-5p;hsa FUT10    |
| RP11-488L18.10 | hsa-let-7a-5p;hsa FUT10    |
| AC009404.2     | hsa-let-7a-5p;hsa FUT10    |
| RP11-78O7.2    | hsa-let-7a-5p;hsa FUT10    |
| LINC00667      | hsa-miR-181a-5p; FAM192A   |
| RP11-631N16.2  | hsa-miR-181a-5p; FAM192A   |
| LINC00467      | hsa-miR-130a-3p; PDP2      |
| RP11-631N16.2  | hsa-miR-106b-5p; TADA2B    |
| LINC00667      | hsa-miR-103a-3p; ZNF680    |
| RNU12          | hsa-miR-130a-5p; FAM222B   |
| LL22NC03-2H8.5 | hsa-let-7a-5p;hsa FAM222B  |
| PWAR6          | hsa-miR-15a-5p;h RAPH1     |
| LINC01355      | hsa-miR-15a-5p;h RAPH1     |
| MEG3           | hsa-let-7g-3p;hsa RAPH1    |
| GS1-124K5.11   | hsa-miR-15a-5p;h RAPH1     |
| PKI55          | hsa-miR-15a-5p;h RAPH1     |
| LINC00667      | hsa-miR-103a-3p; ZNF449    |
| LINC00969      | hsa-miR-15a-5p;h ZNF622    |
| RNU12          | hsa-miR-15a-5p;h ZNF622    |
| RNU12          | hsa-miR-1304-3p; RBM4B     |
| RP11-498C9.15  | hsa-miR-548am-5 RBM4B      |
| RP11-1055B8.4  | hsa-miR-132-3p;h UBXN2A    |
| MIRLET7BHG     | hsa-miR-30c-1-3p; FBXO45   |
| CTD-2587M2.1   | hsa-miR-25-3p;hs ZDHHC24   |
| LINC00630      | hsa-miR-25-3p;hs ZDHHC24   |
| RNU12          | hsa-miR-17-5p;hs GTF2IRD2B |
| RP11-631N16.2  | hsa-miR-106a-5p; GTF2IRD2B |
| RP11-1055B8.4  | hsa-miR-30b-3p;h MFSD4A    |
| MIRLET7BHG     | hsa-miR-29a-3p;h SLC29A2   |
| LINC00969      | hsa-miR-15a-5p;h DENND6A   |
| LINC00667      | hsa-miR-19a-3p;h DENND6A   |
| RNU12          | hsa-miR-15a-5p;h DENND6A   |
| RP11-121C2.2   | hsa-let-7a-5p;hsa MARCKSL1 |
| AC009404.2     | hsa-let-7a-5p;hsa MARCKSL1 |
| LINC01355      | hsa-miR-30a-5p;h MARCKSL1  |
| RP11-488L18.10 | hsa-let-7a-5p;hsa MARCKSL1 |
| RP11-78O7.2    | hsa-let-7a-5p;hsa MARCKSL1 |
| RP11-332H14.2  | hsa-miR-30a-5p;h MARCKSL1  |
| PKI55          | hsa-let-7a-5p;hsa MARCKSL1 |

|                |                           |
|----------------|---------------------------|
| LINC01355      | hsa-miR-199a-3p; CSRNP2   |
| RP11-631N16.2  | hsa-miR-30b-5p;h TOMM5    |
| CTD-2587M2.1   | hsa-miR-25-3p;hs DENND2C  |
| LINC00630      | hsa-miR-25-3p;hs DENND2C  |
| RP11-78O7.2    | hsa-let-7a-5p;hsa ZBTB8OS |
| AC009404.2     | hsa-let-7a-5p;hsa ZBTB8OS |
| PKI55          | hsa-let-7a-5p;hsa ZBTB8OS |
| MEG3           | hsa-let-7a-5p;hsa ZBTB8OS |
| RP11-488L18.10 | hsa-let-7a-5p;hsa ZBTB8OS |
| RP11-121C2.2   | hsa-let-7a-5p;hsa ZBTB8OS |
| RP11-631N16.2  | hsa-miR-106a-5p; MYO1D    |
| CTD-2587M2.1   | hsa-miR-25-3p;hs CDK5R1   |
| LINC00630      | hsa-miR-25-3p;hs CDK5R1   |
| RP11-631N16.2  | hsa-miR-30a-5p;h PNMA1    |
| PKI55          | hsa-let-7a-5p;hsa MTX3    |
| RP11-78O7.2    | hsa-let-7a-5p;hsa MTX3    |
| AC009404.2     | hsa-let-7a-5p;hsa MTX3    |
| RP11-488L18.10 | hsa-let-7a-5p;hsa MTX3    |
| RP11-121C2.2   | hsa-let-7a-5p;hsa MTX3    |
| LINC00630      | hsa-miR-25-3p;hs ZBTB34   |
| CTD-2587M2.1   | hsa-miR-25-3p;hs ZBTB34   |
| RP11-701H24.4  | hsa-miR-425-5p;h ZBTB34   |
| RP11-631N16.2  | hsa-miR-106a-5p; FAM210A  |
| RP11-631N16.2  | hsa-miR-30a-5p;h PAWR     |
| LINC00667      | hsa-miR-103a-3p; PAWR     |
| PKI55          | hsa-miR-1-3p;hsa SLC25A22 |
| GS1-124K5.11   | hsa-miR-15a-5p;h SLC25A22 |
| LINC01355      | hsa-miR-15a-5p;h SLC25A22 |
| PWAR6          | hsa-miR-1-3p;hsa SLC25A22 |
| LINC01355      | hsa-miR-30a-5p;h SOX12    |
| MEG3           | hsa-miR-18a-5p;h SOX12    |
| RP11-332H14.2  | hsa-miR-30a-5p;h SOX12    |
| LINC01355      | hsa-miR-15a-5p;h ZNF620   |
| LINC00467      | hsa-miR-130a-3p; ZNF620   |
| GS1-124K5.11   | hsa-miR-15a-5p;h ZNF620   |
| RP11-631N16.2  | hsa-miR-106a-5p; ZNF354B  |
| PWAR6          | hsa-miR-101-3p;h ZNF223   |
| PWAR6          | hsa-miR-15a-5p;h EDC3     |
| RP11-332H14.2  | hsa-miR-30a-5p;h EDC3     |
| LINC01355      | hsa-miR-15a-5p;h EDC3     |
| MEG3           | hsa-miR-15a-5p;h EDC3     |
| RP11-631N16.2  | hsa-miR-30a-5p;h FUCA1    |
| MEG3           | hsa-miR-106b-5p; C14orf28 |
| RP11-121C2.2   | hsa-miR-548ak;hs; BBS10   |
| RP11-1055B8.4  | hsa-miR-103a-3p; RCC1     |
| RP11-121C2.2   | hsa-miR-548ak;hs; ZNRF2   |
| LL22NC03-2H8.5 | hsa-let-7b-5p;hsa ZNF609  |
| RP11-701H24.4  | hsa-miR-106a-5p; GPR157   |
| MEG3           | hsa-miR-106a-5p; GPR157   |
| GS1-124K5.11   | hsa-miR-15a-5p;h HIGD1A   |
| MEG3           | hsa-miR-15a-5p;h HIGD1A   |
| PKI55          | hsa-miR-15a-5p;h HIGD1A   |
| RNU12          | hsa-miR-150-5p;h FRAT2    |
| LINC00969      | hsa-miR-1225-5p; ZNF678   |
| RP11-352M15.2  | hsa-miR-126-5p;h PLAG1    |
| LINC00969      | hsa-miR-15a-5p;h PLAG1    |
| LINC00667      | hsa-miR-107;hsa- PLAG1    |
| LINC00969      | hsa-miR-15a-5p;h YIPF6    |

|                |                            |
|----------------|----------------------------|
| RP11-701H24.4  | hsa-miR-519a-3p; C5orf30   |
| PWAR6          | hsa-miR-15a-5p;h EXT1      |
| LINC01355      | hsa-miR-15a-5p;h EXT1      |
| PKI55          | hsa-miR-15a-5p;h EXT1      |
| GS1-124K5.11   | hsa-miR-15a-5p;h EXT1      |
| RP11-701H24.4  | hsa-miR-106a-5p; CEP97     |
| LINC00106      | hsa-miR-17-3p;hs MTA1      |
| RP11-631N16.2  | hsa-miR-30a-5p;h FANCF     |
| MEG3           | hsa-miR-125a-3p; SMDT1     |
| PKI55          | hsa-miR-15a-5p;h SMDT1     |
| GS1-124K5.11   | hsa-miR-15a-5p;h SMDT1     |
| PWAR6          | hsa-miR-15a-5p;h SMDT1     |
| LINC01355      | hsa-miR-15a-5p;h SMDT1     |
| RP11-701H24.4  | hsa-miR-106a-5p; CCDC125   |
| LINC00969      | hsa-miR-129-5p;h SF3A3     |
| RNU12          | hsa-miR-150-5p;h GTF2H2C   |
| RP11-631N16.2  | hsa-miR-106a-5p; GTF2H2C   |
| GS1-124K5.11   | hsa-miR-15a-5p;h CMTM4     |
| MEG3           | hsa-miR-1283;hsa CMTM4     |
| LINC01355      | hsa-miR-15a-5p;h CMTM4     |
| PWAR6          | hsa-miR-15a-5p;h CMTM4     |
| SNHG8          | hsa-miR-124-3p;h CHEK2     |
| RP11-121C2.2   | hsa-miR-26a-5p;h CHEK2     |
| LINC00467      | hsa-miR-130a-3p; CHEK2     |
| PKI55          | hsa-miR-124-3p;h CHEK2     |
| PWAR6          | hsa-miR-15a-5p;h VPS33B    |
| PKI55          | hsa-miR-15a-5p;h VPS33B    |
| LINC01355      | hsa-miR-15a-5p;h VPS33B    |
| GS1-124K5.11   | hsa-miR-15a-5p;h VPS33B    |
| MEG3           | hsa-miR-15a-5p;h VPS33B    |
| LINC00969      | hsa-miR-199a-5p; ZFP1      |
| RP11-631N16.2  | hsa-miR-106a-5p; ATL3      |
| RP11-332H14.2  | hsa-miR-30a-5p;h NDUFA12   |
| LINC01355      | hsa-miR-30a-5p;h NDUFA12   |
| RP11-78O7.2    | hsa-let-7a-5p;hsa SDR42E1  |
| RP11-121C2.2   | hsa-let-7a-5p;hsa SDR42E1  |
| AC009404.2     | hsa-let-7a-5p;hsa SDR42E1  |
| MEG3           | hsa-let-7a-5p;hsa SDR42E1  |
| RP11-488L18.10 | hsa-let-7a-5p;hsa SDR42E1  |
| PKI55          | hsa-let-7a-5p;hsa SDR42E1  |
| RP11-121C2.2   | hsa-let-7a-5p;hsa BRI3BP   |
| RP11-488L18.10 | hsa-let-7a-5p;hsa BRI3BP   |
| RP11-78O7.2    | hsa-let-7a-5p;hsa BRI3BP   |
| AC009404.2     | hsa-let-7a-5p;hsa BRI3BP   |
| RP11-701H24.4  | hsa-miR-106a-5p; BRI3BP    |
| PKI55          | hsa-let-7a-5p;hsa BRI3BP   |
| MEG3           | hsa-let-7a-5p;hsa BRI3BP   |
| MEG3           | hsa-miR-106a-5p; UBOX5     |
| RP11-701H24.4  | hsa-miR-106a-5p; UBOX5     |
| RP11-488L18.10 | hsa-let-7a-5p;hsa FAM43A   |
| RP11-78O7.2    | hsa-let-7a-5p;hsa FAM43A   |
| RP11-121C2.2   | hsa-let-7a-5p;hsa FAM43A   |
| MEG3           | hsa-let-7a-5p;hsa FAM43A   |
| AC009404.2     | hsa-let-7a-5p;hsa FAM43A   |
| PKI55          | hsa-let-7a-5p;hsa FAM43A   |
| RNU12          | hsa-miR-15a-5p;h PURA      |
| RP11-701H24.4  | hsa-miR-106a-5p; TNFAIP8L1 |
| RP11-332H14.2  | hsa-miR-150-5p;h TNFAIP8L1 |

|                |                           |
|----------------|---------------------------|
| PWAR6          | hsa-miR-15a-5p;h MRPL40   |
| LINC01355      | hsa-miR-15a-5p;h MRPL40   |
| PKI55          | hsa-miR-15a-5p;h MRPL40   |
| GS1-124K5.11   | hsa-miR-15a-5p;h MRPL40   |
| MEG3           | hsa-miR-15a-5p;h MRPL40   |
| RP11-631N16.2  | hsa-miR-106a-5p; CXorf38  |
| RNU12          | hsa-miR-150-5p;h CXorf38  |
| RP11-701H24.4  | hsa-miR-106a-5p; WDR53    |
| MEG3           | hsa-miR-106a-5p; WDR53    |
| RP11-78O7.2    | hsa-let-7a-5p;hsa ZNF566  |
| RP11-121C2.2   | hsa-let-7a-5p;hsa ZNF566  |
| PKI55          | hsa-let-7a-5p;hsa ZNF566  |
| AC009404.2     | hsa-let-7a-5p;hsa ZNF566  |
| RP11-488L18.10 | hsa-let-7a-5p;hsa ZNF566  |
| RP11-631N16.2  | hsa-miR-106a-5p; C15orf41 |
| RP11-631N16.2  | hsa-miR-106b-5p; ZBTB6    |
| RNU12          | hsa-miR-17-5p;hs ZBTB6    |
| MEG3           | hsa-miR-15a-5p;h ZNRF1    |
| GS1-124K5.11   | hsa-miR-15a-5p;h ZNRF1    |
| MIRLET7BHG     | hsa-miR-24-3p;hs ZNF17    |
| PKI55          | hsa-miR-124-3p;h BACE1    |
| MEG3           | hsa-miR-107;hsa- BACE1    |
| PWAR6          | hsa-miR-124-3p;h BACE1    |
| MEG3           | hsa-miR-106a-5p; CCDC30   |
| RP11-701H24.4  | hsa-miR-106a-5p; CCDC30   |
| RP11-498C9.15  | hsa-miR-548am-5 ZNF395    |
| RNU12          | hsa-miR-548a-5p; ZNF395   |
| RP11-78O7.2    | hsa-let-7a-5p;hsa RHD     |
| AC009404.2     | hsa-let-7a-5p;hsa RHD     |
| PKI55          | hsa-let-7a-5p;hsa RHD     |
| RP11-121C2.2   | hsa-let-7a-5p;hsa RHD     |
| RP11-488L18.10 | hsa-let-7a-5p;hsa RHD     |
| MEG3           | hsa-let-7a-5p;hsa RHD     |
| AC004951.6     | hsa-miR-30a-3p;h ENTPD5   |
| MIRLET7BHG     | hsa-miR-221-5p;h DNAH17   |
| RP11-1055B8.4  | hsa-miR-221-5p;h DNAH17   |
| RP11-631N16.2  | hsa-miR-106a-5p; ZNF70    |
| RP11-631N16.2  | hsa-miR-181a-5p; ZNF669   |
| LINC00969      | hsa-miR-15a-5p;h PDCC1    |
| RNU12          | hsa-miR-15a-5p;h PDCC1    |
| RP11-458F8.4   | hsa-let-7a-5p;hsa BEND4   |
| LINC00630      | hsa-miR-25-3p;hs TRMT2B   |
| CTD-2587M2.1   | hsa-miR-25-3p;hs TRMT2B   |
| RP11-631N16.2  | hsa-miR-106a-5p; ADAT2    |
| LL22NC03-2H8.5 | hsa-let-7a-5p;hsa RNFT1   |
| SNHG8          | hsa-miR-18a-3p;h FAM179A  |
| LINC00667      | hsa-miR-181a-5p; BLOC1S2  |
| RP11-631N16.2  | hsa-miR-181a-5p; BLOC1S2  |
| LINC00630      | hsa-miR-25-3p;hs SPATS2L  |
| CTD-2587M2.1   | hsa-miR-25-3p;hs SPATS2L  |
| RP11-631N16.2  | hsa-miR-106a-5p; GTF2IRD2 |
| RP11-631N16.2  | hsa-miR-106a-5p; TRAPPC2  |
| AC009404.2     | hsa-let-7a-5p;hsa ZNF799  |
| RP11-488L18.10 | hsa-let-7a-5p;hsa ZNF799  |
| PKI55          | hsa-let-7a-5p;hsa ZNF799  |
| RP11-78O7.2    | hsa-let-7a-5p;hsa ZNF799  |
| RP11-121C2.2   | hsa-let-7a-5p;hsa ZNF799  |
| LINC00667      | hsa-miR-135a-5p; ZNF846   |

|                |                             |
|----------------|-----------------------------|
| GS1-124K5.11   | hsa-miR-15a-5p;h TECPR2     |
| PKI55          | hsa-miR-15a-5p;h TECPR2     |
| RNU12          | hsa-miR-150-5p;h TLR7       |
| RP11-631N16.2  | hsa-miR-106a-5p; TLR7       |
| LL22NC03-2H8.5 | hsa-let-7a-5p;hsa NHLRC2    |
| PKI55          | hsa-let-7a-5p;hsa KPNA5     |
| RP11-121C2.2   | hsa-let-7a-5p;hsa KPNA5     |
| RP11-78O7.2    | hsa-let-7a-5p;hsa KPNA5     |
| RP11-488L18.10 | hsa-let-7a-5p;hsa KPNA5     |
| AC009404.2     | hsa-let-7a-5p;hsa KPNA5     |
| RP11-1055B8.4  | hsa-miR-30b-3p;h SERTAD1    |
| LINC00969      | hsa-miR-15a-5p;h SLC25A29   |
| RNU12          | hsa-miR-15a-5p;h SLC25A29   |
| RNU12          | hsa-miR-1304-3p; ZNF682     |
| RP11-631N16.2  | hsa-miR-106a-5p; ZNF682     |
| LINC00630      | hsa-miR-25-3p;hs ZNF772     |
| CTD-2587M2.1   | hsa-miR-137;hsa- ZNF772     |
| RP11-79H23.3   | hsa-miR-23a-3p;h ZNF257     |
| RP11-701H24.4  | hsa-miR-106a-5p; ZNF785     |
| RP11-631N16.2  | hsa-miR-106a-5p; DDI2       |
| RNU12          | hsa-miR-150-5p;h DDI2       |
| RP11-701H24.4  | hsa-miR-106a-5p; ZNF786     |
| RP11-631N16.2  | hsa-miR-106a-5p; IPP        |
| LINC00910      | hsa-let-7b-5p;hsa RAB40C    |
| PWAR6          | hsa-miR-101-3p;h TAF13      |
| LINC01355      | hsa-miR-101-3p;h TAF13      |
| GS1-124K5.11   | hsa-miR-103a-3p; TAF13      |
| PKI55          | hsa-miR-101-3p;h TAF13      |
| MEG3           | hsa-miR-103a-3p; TAF13      |
| RP11-631N16.2  | hsa-miR-106a-5p; ZNF780A    |
| RP11-78O7.2    | hsa-let-7a-5p;hsa HIST1H2BK |
| RP11-121C2.2   | hsa-let-7a-5p;hsa HIST1H2BK |
| PKI55          | hsa-let-7a-5p;hsa HIST1H2BK |
| RP11-488L18.10 | hsa-let-7a-5p;hsa HIST1H2BK |
| MEG3           | hsa-let-7a-5p;hsa HIST1H2BK |
| AC009404.2     | hsa-let-7a-5p;hsa HIST1H2BK |
| RNU12          | hsa-miR-130a-5p; ZNF273     |
| RP11-701H24.4  | hsa-miR-106a-5p; PRIM1      |
| LINC00630      | hsa-miR-25-3p;hs TOR4A      |
| CTD-2587M2.1   | hsa-miR-25-3p;hs TOR4A      |
| PKI55          | hsa-miR-19a-3p;h ASNA1      |
| SNHG8          | hsa-miR-149-3p;h ASNA1      |
| LINC00969      | hsa-miR-1283;hsa ZNF480     |
| GS1-124K5.11   | hsa-miR-15a-5p;h TPM2       |
| LINC01355      | hsa-miR-15a-5p;h TPM2       |
| PWAR6          | hsa-miR-1-3p;hsa TPM2       |
| MEG3           | hsa-miR-125a-3p; TPM2       |
| PKI55          | hsa-miR-1-3p;hsa TPM2       |
| LL22NC03-2H8.5 | hsa-let-7a-5p;hsa IPO9      |
| RP11-631N16.2  | hsa-miR-106b-5p; INPP5F     |
| RP11-1055B8.4  | hsa-miR-199a-3p; FICD       |
| RP11-701H24.4  | hsa-miR-106a-5p; FICD       |
| PWAR6          | hsa-miR-17-5p;hs FICD       |
| MEG3           | hsa-miR-106a-5p; FICD       |
| LINC00467      | hsa-miR-130a-3p; RUND1      |
| PKI55          | hsa-let-7a-5p;hsa ATG9A     |
| RP11-78O7.2    | hsa-let-7a-5p;hsa ATG9A     |
| RP11-121C2.2   | hsa-let-7a-5p;hsa ATG9A     |



|                |                             |
|----------------|-----------------------------|
| MEG3           | hsa-let-7a-5p;hsa ATG9A     |
| RP11-488L18.10 | hsa-let-7a-5p;hsa ATG9A     |
| GS1-124K5.11   | hsa-miR-15a-5p;h ATG9A      |
| AC009404.2     | hsa-let-7a-5p;hsa ATG9A     |
| MEG3           | hsa-miR-186-3p;h DMD        |
| CTD-2587M2.1   | hsa-miR-25-3p;hs TATDN3     |
| LINC00630      | hsa-miR-25-3p;hs TATDN3     |
| RP11-498C9.15  | hsa-miR-23a-3p;h SDHD       |
| RNU12          | hsa-miR-130a-5p; SDHD       |
| LINC00969      | hsa-miR-1283;hsa C5orf51    |
| RNU12          | hsa-miR-548a-5p; KLRC3      |
| LINC00667      | hsa-miR-548ak;hs; KLRC3     |
| RP11-498C9.15  | hsa-miR-369-3p;h KLRC3      |
| LINC01355      | hsa-miR-15a-5p;h HN1L       |
| MEG3           | hsa-miR-15a-5p;h HN1L       |
| PKI55          | hsa-miR-15a-5p;h HN1L       |
| PWAR6          | hsa-miR-15a-5p;h HN1L       |
| GS1-124K5.11   | hsa-miR-15a-5p;h HN1L       |
| RP11-631N16.2  | hsa-miR-106a-5p; FGFR1OP    |
| RNU12          | hsa-miR-15a-5p;h CHUK       |
| RNU12          | hsa-miR-150-5p;h SYNJ2BP    |
| RP11-631N16.2  | hsa-miR-106a-5p; SYNJ2BP    |
| LL22NC03-2H8.5 | hsa-let-7a-5p;hsa SYNJ2BP   |
| RP11-488L18.10 | hsa-let-7a-5p;hsa NCKIPSD   |
| AC009404.2     | hsa-let-7a-5p;hsa NCKIPSD   |
| RP11-78O7.2    | hsa-let-7a-5p;hsa NCKIPSD   |
| RP11-121C2.2   | hsa-let-7a-5p;hsa NCKIPSD   |
| SNHG8          | hsa-miR-125a-3p; S1PR3      |
| PWAR6          | hsa-miR-124-3p;h IFRD2      |
| PKI55          | hsa-miR-124-3p;h IFRD2      |
| RP11-631N16.2  | hsa-miR-106a-5p; TMEM242    |
| LINC00667      | hsa-miR-106b-5p; TMEM242    |
| RNU12          | hsa-miR-548a-5p; TIAF1      |
| LL22NC03-2H8.5 | hsa-let-7a-5p;hsa TIAF1     |
| RP11-498C9.15  | hsa-miR-548am-5 TIAF1       |
| MEG3           | hsa-miR-106a-5p; SMIM13     |
| RP11-701H24.4  | hsa-miR-106a-5p; SMIM13     |
| RP11-631N16.2  | hsa-miR-106a-5p; CDKN2AIPNL |
| RNU12          | hsa-miR-150-5p;h CDKN2AIPNL |
| RP11-631N16.2  | hsa-miR-106a-5p; LY6G5B     |
| RNU12          | hsa-miR-150-5p;h LY6G5B     |
| RP11-631N16.2  | hsa-miR-106a-5p; ISY1       |
| PKI55          | hsa-let-7a-5p;hsa YAE1D1    |
| RP11-78O7.2    | hsa-let-7a-5p;hsa YAE1D1    |
| MIRLET7BHG     | hsa-miR-139-3p;h YAE1D1     |
| RP11-488L18.10 | hsa-let-7a-5p;hsa YAE1D1    |
| RP11-121C2.2   | hsa-let-7a-5p;hsa YAE1D1    |
| AC009404.2     | hsa-let-7a-5p;hsa YAE1D1    |
| RP11-121C2.2   | hsa-let-7a-5p;hsa PEG10     |
| AC009404.2     | hsa-let-7a-5p;hsa PEG10     |
| RP11-78O7.2    | hsa-let-7a-5p;hsa PEG10     |
| RP11-488L18.10 | hsa-let-7a-5p;hsa PEG10     |
| PKI55          | hsa-let-7a-5p;hsa PEG10     |
| RNU12          | hsa-miR-15a-5p;h AP5Z1      |
| LINC00969      | hsa-miR-137;hsa- AP5Z1      |
| RNU12          | hsa-miR-150-5p;h DDOST      |
| RP11-121C2.2   | hsa-let-7a-5p;hsa MARS2     |
| MEG3           | hsa-let-7a-5p;hsa MARS2     |

|                |                               |
|----------------|-------------------------------|
| RP11-488L18.10 | hsa-let-7a-5p;hsa MARS2       |
| RP11-78O7.2    | hsa-let-7a-5p;hsa MARS2       |
| PKI55          | hsa-let-7a-5p;hsa MARS2       |
| AC009404.2     | hsa-let-7a-5p;hsa MARS2       |
| LINC01006      | hsa-miR-199a-5p; ZNF286B      |
| MEG3           | hsa-miR-106a-5p; CCDC71L      |
| LINC01355      | hsa-miR-221-5p;h CCDC71L      |
| RP11-701H24.4  | hsa-miR-106a-5p; CCDC71L      |
| PWAR6          | hsa-miR-17-5p;hs CCDC71L      |
| RP11-332H14.2  | hsa-miR-30a-5p;h CCDC71L      |
| LINC00667      | hsa-miR-181a-5p; ZNF253       |
| RNU12          | hsa-miR-130a-5p; ZNF253       |
| MEG3           | hsa-miR-124-3p;h GALNT4       |
| LINC00467      | hsa-miR-130a-3p; GALNT4       |
| LINC00467      | hsa-miR-130a-3p; POC1B-GALNT4 |
| LINC00969      | hsa-miR-17-3p;hs ITGB3        |
| LINC00630      | hsa-miR-25-3p;hs MYZAP        |
| CTD-2587M2.1   | hsa-miR-25-3p;hs MYZAP        |
| LINC00667      | hsa-miR-125a-5p; NBPF11       |
| RP11-631N16.2  | hsa-miR-106a-5p; RNF115       |
| RNU12          | hsa-miR-150-5p;h RNF115       |
| LINC00630      | hsa-miR-25-3p;hs ZNF850       |
| CTD-2587M2.1   | hsa-miR-25-3p;hs ZNF850       |
| LINC00467      | hsa-miR-130a-3p; S1PR2        |
| MIRLET7BHG     | hsa-miR-188-3p;h NDUFA7       |
| RP11-701H24.4  | hsa-miR-106a-5p; SPIB         |
